# Supplementary material for: Ultralow detection limit and high sensitivity X-ray detector of high-quality MAPbBr3 perovskite single crystals
Source: Royal Society of Chemistry journal article supplement (doi:10.1039/d4ta00492b), 2024-01-01
Supplement: d4ta00492b1.xlsx [file d4ta00492b1.xlsx]

## Sheet: Sheet1
time (s)	electric field (V cm-1)	dark current (A)
0.5	20	5.9259e-10
1	20	5.8911e-10
1.5	20	5.8513e-10
2	20	5.8192e-10
2.5	20	5.7992e-10
3	20	5.7773e-10
3.5	20	5.7583e-10
4	20	5.7455e-10
4.5	20	5.7298e-10
5	20	5.7155e-10
5.5	20	5.7016e-10
6	20	5.6908e-10
6.5	20	5.6786e-10
7	20	5.6679e-10
7.5	20	5.6576e-10
8	20	5.6513e-10
8.5	20	5.6447e-10
9	20	5.6363e-10
9.5	20	5.6285e-10
10	20	5.6178e-10
10.5	20	5.6111e-10
11	20	5.6038e-10
11.5	20	5.598e-10
12	20	5.5932e-10
12.5	20	5.5835e-10
13	20	5.5783e-10
13.5	20	5.5738e-10
14	20	5.567e-10
14.5	20	5.5617e-10
15	20	5.5554e-10
15.5	20	5.5501e-10
16	20	5.5459e-10
16.5	20	5.5406e-10
17	20	5.5389e-10
17.5	20	5.5341e-10
18	20	5.5307e-10
18.5	20	5.525e-10
19	20	5.5174e-10
19.5	20	5.5133e-10
20	20	5.5106e-10
20.5	20	5.5077e-10
21	20	5.5037e-10
21.5	20	5.499e-10
22	20	5.4923e-10
22.5	20	5.4912e-10
23	20	5.4888e-10
23.5	20	5.4838e-10
24	20	5.4835e-10
24.5	20	5.4771e-10
25	20	5.4743e-10
25.5	20	5.4706e-10
26	20	5.4681e-10
26.5	20	5.4619e-10
27	20	5.4594e-10
27.5	20	5.4561e-10
28	20	5.4558e-10
28.5	20	5.4509e-10
29	20	5.4454e-10
29.5	20	5.4431e-10
30	20	5.438e-10
30.5	20	5.4379e-10
31	20	5.4311e-10
31.5	20	5.4316e-10
32	20	5.4293e-10
32.5	20	5.4283e-10
33	20	5.4224e-10
33.5	20	5.4205e-10
34	20	5.4181e-10
34.5	20	5.4138e-10
35	20	5.4118e-10
35.5	20	5.4085e-10
36	20	5.4088e-10
36.5	20	5.405e-10
37	20	5.4045e-10
37.5	20	5.3987e-10
38	20	5.3956e-10
38.5	20	5.3943e-10
39	20	5.3921e-10
39.5	20	5.3929e-10
40	20	5.3875e-10
40.5	20	5.3867e-10
41	20	5.3833e-10
41.5	20	5.3835e-10
42	20	5.3819e-10
42.5	20	5.3774e-10
43	20	5.3761e-10
43.5	20	5.3722e-10
44	20	5.3675e-10
44.5	20	5.3654e-10
45	20	5.3651e-10
45.5	20	5.3635e-10
46	20	5.3634e-10
46.5	20	5.3619e-10
47	20	5.3577e-10
47.5	20	5.3556e-10
48	20	5.3536e-10
48.5	20	5.3528e-10
49	20	5.3492e-10
49.5	20	5.3473e-10
50	20	5.3439e-10
50.5	20	5.345e-10
51	20	5.3423e-10
51.5	20	5.3383e-10
52	20	5.334e-10
52.5	20	5.336e-10
53	20	5.334e-10
53.5	20	5.3315e-10
54	20	5.3303e-10
54.5	20	5.3292e-10
55	20	5.3273e-10
55.5	20	5.3239e-10
56	20	5.3204e-10
56.5	20	5.3219e-10
57	20	5.3189e-10
57.5	20	5.3158e-10
58	20	5.3144e-10
58.5	20	5.3145e-10
59	20	5.3138e-10
59.5	20	5.3079e-10
60	20	5.3084e-10
60.5	20	5.3072e-10
61	20	5.3052e-10
61.5	20	5.3042e-10
62	20	5.2979e-10
62.5	20	5.2999e-10
63	20	5.2958e-10
63.5	20	5.2943e-10
64	20	5.2953e-10
64.5	20	5.2926e-10
65	20	5.2904e-10
65.5	20	5.288e-10
66	20	5.2899e-10
66.5	20	5.2873e-10
67	20	5.2841e-10
67.5	20	5.2806e-10
68	20	5.2833e-10
68.5	20	5.2803e-10
69	20	5.2779e-10
69.5	20	5.2768e-10
70	20	5.2753e-10
70.5	20	5.274e-10
71	20	5.2729e-10
71.5	20	5.2716e-10
72	20	5.2721e-10
72.5	20	5.2673e-10
73	20	5.2663e-10
73.5	20	5.2631e-10
74	20	5.2647e-10
74.5	20	5.2624e-10
75	20	5.2603e-10
75.5	20	5.2578e-10
76	20	5.2578e-10
76.5	20	5.2568e-10
77	20	5.254e-10
77.5	20	5.256e-10
78	20	5.253e-10
78.5	20	5.2519e-10
79	20	5.2533e-10
79.5	20	5.2528e-10
80	20	5.2483e-10
80.5	20	5.2498e-10
81	20	5.2491e-10
81.5	20	5.2445e-10
82	20	5.2442e-10
82.5	20	5.2436e-10
83	20	5.2422e-10
83.5	20	5.2422e-10
84	20	5.2404e-10
84.5	20	5.2391e-10
85	20	5.2397e-10
85.5	20	5.2364e-10
86	20	5.2358e-10
86.5	20	5.235e-10
87	20	5.2349e-10
87.5	20	5.2341e-10
88	20	5.2328e-10
88.5	20	5.232e-10
89	20	5.23e-10
89.5	20	5.2294e-10
90	20	5.2292e-10
90.5	20	5.2282e-10
91	20	5.226e-10
91.5	20	5.2259e-10
92	20	5.2244e-10
92.5	20	5.2239e-10
93	20	5.2233e-10
93.5	20	5.2219e-10
94	20	5.223e-10
94.5	20	5.2171e-10
95	20	5.2188e-10
95.5	20	5.2164e-10
96	20	5.2158e-10
96.5	20	5.2142e-10
97	20	5.213e-10
97.5	20	5.21e-10
98	20	5.2132e-10
98.5	20	5.2113e-10
99	20	5.2087e-10
99.5	20	5.2071e-10
100	20	5.2078e-10
100.5	20	5.2035e-10
101	20	5.2043e-10
101.5	20	5.2035e-10
102	20	5.2034e-10
102.5	20	5.2041e-10
103	20	5.2022e-10
103.5	20	5.2014e-10
104	20	5.1999e-10
104.5	20	5.1977e-10
105	20	5.1947e-10
105.5	20	5.195e-10
106	20	5.1922e-10
106.5	20	5.1898e-10
107	20	5.1938e-10
107.5	20	5.192e-10
108	20	5.1891e-10
108.5	20	5.1909e-10
109	20	5.1898e-10
109.5	20	5.1865e-10
110	20	5.189e-10
110.5	20	5.1869e-10
111	20	5.1826e-10
111.5	20	5.1847e-10
112	20	5.1812e-10
112.5	20	5.1807e-10
113	20	5.1816e-10
113.5	20	5.1777e-10
114	20	5.1773e-10
114.5	20	5.1807e-10
115	20	5.1762e-10
115.5	20	5.1764e-10
116	20	5.1754e-10
116.5	20	5.1739e-10
117	20	5.1708e-10
117.5	20	5.173e-10
118	20	5.173e-10
118.5	20	5.1723e-10
119	20	5.1703e-10
119.5	20	5.1696e-10
120	20	5.1677e-10
120.5	20	5.1669e-10
121	20	5.1652e-10
121.5	20	5.165e-10
122	20	5.165e-10
122.5	20	5.1641e-10
123	20	5.161e-10
123.5	20	5.1604e-10
124	20	5.1618e-10
124.5	20	5.162e-10
125	20	5.1584e-10
125.5	20	5.1579e-10
126	20	5.1565e-10
126.5	20	5.1571e-10
127	20	5.1544e-10
127.5	20	5.1562e-10
128	20	5.1557e-10
128.5	20	5.1495e-10
129	20	5.1483e-10
129.5	20	5.1483e-10
130	20	5.15e-10
130.5	20	5.1461e-10
131	20	5.1448e-10
131.5	20	5.1445e-10
132	20	5.1431e-10
132.5	20	5.1433e-10
133	20	5.142e-10
133.5	20	5.1415e-10
134	20	5.1394e-10
134.5	20	5.1391e-10
135	20	5.1398e-10
135.5	20	5.1388e-10
136	20	5.1385e-10
136.5	20	5.1345e-10
137	20	5.1347e-10
137.5	20	5.1344e-10
138	20	5.1368e-10
138.5	20	5.1277e-10
139	20	5.1292e-10
139.5	20	5.1304e-10
140	20	5.1353e-10
140.5	20	5.1294e-10
141	20	5.1291e-10
141.5	20	5.133e-10
142	20	5.1272e-10
142.5	20	5.124e-10
143	20	5.1226e-10
143.5	20	5.1246e-10
144	20	5.12e-10
144.5	20	5.1201e-10
145	20	5.1188e-10
145.5	20	5.1211e-10
146	20	5.119e-10
146.5	20	5.114e-10
147	20	5.1153e-10
147.5	20	5.1146e-10
148	20	5.1171e-10
148.5	20	5.1142e-10
149	20	5.1113e-10
149.5	20	5.1128e-10
150	20	5.1126e-10
150.5	20	5.1107e-10
151	20	5.1111e-10
151.5	20	5.106e-10
152	20	5.1033e-10
152.5	20	5.1072e-10
153	20	5.1028e-10
153.5	20	5.1044e-10
154	20	5.1061e-10
154.5	20	5.1062e-10
155	20	5.1024e-10
155.5	20	5.1043e-10
156	20	5.0998e-10
156.5	20	5.0993e-10
157	20	5.0994e-10
157.5	20	5.0991e-10
158	20	5.0985e-10
158.5	20	5.0989e-10
159	20	5.0994e-10
159.5	20	5.0949e-10
160	20	5.0927e-10
160.5	20	5.0973e-10
161	20	5.0921e-10
161.5	20	5.0896e-10
162	20	5.089e-10
162.5	20	5.0881e-10
163	20	5.0889e-10
163.5	20	5.0884e-10
164	20	5.0895e-10
164.5	20	5.0868e-10
165	20	5.0868e-10
165.5	20	5.0853e-10
166	20	5.0812e-10
166.5	20	5.0832e-10
167	20	5.0778e-10
167.5	20	5.081e-10
168	20	5.079e-10
168.5	20	5.0796e-10
169	20	5.0781e-10
169.5	20	5.0769e-10
170	20	5.0745e-10
170.5	20	5.0748e-10
171	20	5.0733e-10
171.5	20	5.0739e-10
172	20	5.0713e-10
172.5	20	5.0717e-10
173	20	5.0703e-10
173.5	20	5.0705e-10
174	20	5.0703e-10
174.5	20	5.0693e-10
175	20	5.0688e-10
175.5	20	5.0684e-10
176	20	5.0682e-10
176.5	20	5.0664e-10
177	20	5.0659e-10
177.5	20	5.0626e-10
178	20	5.0634e-10
178.5	20	5.0672e-10
179	20	5.0628e-10
179.5	20	5.0595e-10
180	20	5.061e-10
180.5	20	5.061e-10
181	20	5.0604e-10
181.5	20	5.0599e-10
182	20	5.0585e-10
182.5	20	5.0578e-10
183	20	5.061e-10
183.5	20	5.057e-10
184	20	5.0548e-10
184.5	20	5.0551e-10
185	20	5.0555e-10
185.5	20	5.0576e-10
186	20	5.052e-10
186.5	20	5.0526e-10
187	20	5.053e-10
187.5	20	5.0499e-10
188	20	5.0495e-10
188.5	20	5.048e-10
189	20	5.0478e-10
189.5	20	5.0497e-10
190	20	5.0486e-10
190.5	20	5.0466e-10
191	20	5.0487e-10
191.5	20	5.0462e-10
192	20	5.0462e-10
192.5	20	5.0468e-10
193	20	5.0441e-10
193.5	20	5.0439e-10
194	20	5.0415e-10
194.5	20	5.0422e-10
195	20	5.0417e-10
195.5	20	5.0405e-10
196	20	5.0414e-10
196.5	20	5.0411e-10
197	20	5.0384e-10
197.5	20	5.0369e-10
198	20	5.0359e-10
198.5	20	5.0354e-10
199	20	5.0353e-10
199.5	20	5.0356e-10
200	20	5.0372e-10
200.5	20	5.0351e-10
201	20	5.0362e-10
201.5	20	5.0365e-10
202	20	5.0357e-10
202.5	20	5.0339e-10
203	20	5.0337e-10
203.5	20	5.0297e-10
204	20	5.0323e-10
204.5	20	5.0336e-10
205	20	5.0327e-10
205.5	20	5.0324e-10
206	20	5.0328e-10
206.5	20	5.0294e-10
207	20	5.029e-10
207.5	20	5.0265e-10
208	20	5.0257e-10
208.5	20	5.0272e-10
209	20	5.0279e-10
209.5	20	5.0255e-10
210	20	5.0243e-10
210.5	20	5.0241e-10
211	20	5.0243e-10
211.5	20	5.0238e-10
212	20	5.0222e-10
212.5	20	5.0204e-10
213	20	5.0212e-10
213.5	20	5.0206e-10
214	20	5.0214e-10
214.5	20	5.0205e-10
215	20	5.0202e-10
215.5	20	5.0166e-10
216	20	5.0225e-10
216.5	20	5.0161e-10
217	20	5.0166e-10
217.5	20	5.0176e-10
218	20	5.019e-10
218.5	20	5.0172e-10
219	20	5.0186e-10
219.5	20	5.0136e-10
220	20	5.014e-10
220.5	20	5.0155e-10
221	20	5.011e-10
221.5	20	5.0109e-10
222	20	5.011e-10
222.5	20	5.0098e-10
223	20	5.0103e-10
223.5	20	5.0101e-10
224	20	5.0074e-10
224.5	20	5.0113e-10
225	20	5.0107e-10
225.5	20	5.0094e-10
226	20	5.0097e-10
226.5	20	5.0055e-10
227	20	5.0068e-10
227.5	20	5.0057e-10
228	20	5.006e-10
228.5	20	5.0034e-10
229	20	5.0053e-10
229.5	20	5.0022e-10
230	20	5.0033e-10
230.5	20	5.0035e-10
231	20	5.0027e-10
231.5	20	5.0019e-10
232	20	5.0033e-10
232.5	20	5.0017e-10
233	20	5.0004e-10
233.5	20	5.0003e-10
234	20	5.0014e-10
234.5	20	4.9984e-10
235	20	4.9997e-10
235.5	20	4.9981e-10
236	20	4.9998e-10
236.5	20	4.9979e-10
237	20	4.9994e-10
237.5	20	4.9957e-10
238	20	4.9964e-10
238.5	20	4.9946e-10
239	20	4.9938e-10
239.5	20	4.9919e-10
240	20	4.9926e-10
240.5	20	4.9927e-10
241	20	4.9907e-10
241.5	20	4.991e-10
242	20	4.9885e-10
242.5	20	4.9917e-10
243	20	4.9941e-10
243.5	20	4.992e-10
244	20	4.9908e-10
244.5	20	4.9889e-10
245	20	4.989e-10
245.5	20	4.9908e-10
246	20	4.9847e-10
246.5	20	4.9857e-10
247	20	4.9875e-10
247.5	20	4.9868e-10
248	20	4.9842e-10
248.5	20	4.9865e-10
249	20	4.9848e-10
249.5	20	4.9835e-10
250	20	4.9838e-10
250.5	20	4.9828e-10
251	20	4.9807e-10
251.5	20	4.9828e-10
252	20	4.9841e-10
252.5	20	4.9806e-10
253	20	4.9815e-10
253.5	20	4.9826e-10
254	20	4.9809e-10
254.5	20	4.9836e-10
255	20	4.9801e-10
255.5	20	4.9809e-10
256	20	4.9805e-10
256.5	20	4.9824e-10
257	20	4.9789e-10
257.5	20	4.9814e-10
258	20	4.978e-10
258.5	20	4.9782e-10
259	20	4.9788e-10
259.5	20	4.9771e-10
260	20	4.977e-10
260.5	20	4.9775e-10
261	20	4.9765e-10
261.5	20	4.9761e-10
262	20	4.9771e-10
262.5	20	4.9738e-10
263	20	4.9746e-10
263.5	20	4.9765e-10
264	20	4.9738e-10
264.5	20	4.9706e-10
265	20	4.9713e-10
265.5	20	4.9733e-10
266	20	4.9723e-10
266.5	20	4.9715e-10
267	20	4.9687e-10
267.5	20	4.9695e-10
268	20	4.9712e-10
268.5	20	4.9704e-10
269	20	4.9669e-10
269.5	20	4.9709e-10
270	20	4.9699e-10
270.5	20	4.9671e-10
271	20	4.9652e-10
271.5	20	4.9642e-10
272	20	4.9678e-10
272.5	20	4.965e-10
273	20	4.9638e-10
273.5	20	4.9682e-10
274	20	4.9671e-10
274.5	20	4.9631e-10
275	20	4.9637e-10
275.5	20	4.9626e-10
276	20	4.9616e-10
276.5	20	4.9599e-10
277	20	4.9606e-10
277.5	20	4.9608e-10
278	20	4.9613e-10
278.5	20	4.9575e-10
279	20	4.9594e-10
279.5	20	4.96e-10
280	20	4.9594e-10
280.5	20	4.9587e-10
281	20	4.9564e-10
281.5	20	4.9591e-10
282	20	4.9567e-10
282.5	20	4.9578e-10
283	20	4.954e-10
283.5	20	4.9539e-10
284	20	4.9565e-10
284.5	20	4.9573e-10
285	20	4.9531e-10
285.5	20	4.9559e-10
286	20	4.9529e-10
286.5	20	4.9558e-10
287	20	4.9531e-10
287.5	20	4.9535e-10
288	20	4.952e-10
288.5	20	4.9528e-10
289	20	4.9569e-10
289.5	20	4.9526e-10
290	20	4.9562e-10
290.5	20	4.9507e-10
291	20	4.9509e-10
291.5	20	4.9546e-10
292	20	4.9488e-10
292.5	20	4.9504e-10
293	20	4.9512e-10
293.5	20	4.9492e-10
294	20	4.9509e-10
294.5	20	4.9483e-10
295	20	4.9476e-10
295.5	20	4.9482e-10
296	20	4.9518e-10
296.5	20	4.9471e-10
297	20	4.947e-10
297.5	20	4.9468e-10
298	20	4.9477e-10
298.5	20	4.9459e-10
299	20	4.9452e-10
299.5	20	4.9439e-10
300	20	4.9473e-10
300.5	20	4.9441e-10
301	20	4.9449e-10
301.5	20	4.9457e-10
302	20	4.9424e-10
302.5	20	4.9419e-10
303	20	4.9448e-10
303.5	20	4.9456e-10
304	20	4.9447e-10
304.5	20	4.9442e-10
305	20	4.9454e-10
305.5	20	4.9419e-10
306	20	4.9423e-10
306.5	20	4.9436e-10
307	20	4.9439e-10
307.5	20	4.9416e-10
308	20	4.9428e-10
308.5	20	4.9435e-10
309	20	4.9391e-10
309.5	20	4.9408e-10
310	20	4.9413e-10
310.5	20	4.941e-10
311	20	4.9383e-10
311.5	20	4.9381e-10
312	20	4.9412e-10
312.5	20	4.9386e-10
313	20	4.9388e-10
313.5	20	4.9371e-10
314	20	4.9366e-10
314.5	20	4.9351e-10
315	20	4.9368e-10
315.5	20	4.9373e-10
316	20	4.938e-10
316.5	20	4.9367e-10
317	20	4.9365e-10
317.5	20	4.9357e-10
318	20	4.9346e-10
318.5	20	4.9346e-10
319	20	4.9355e-10
319.5	20	4.935e-10
320	20	4.934e-10
320.5	20	4.932e-10
321	20	4.934e-10
321.5	20	4.9316e-10
322	20	4.9309e-10
322.5	20	4.9352e-10
323	20	4.9337e-10
323.5	20	4.9359e-10
324	20	4.9331e-10
324.5	20	4.9297e-10
325	20	4.9338e-10
325.5	20	4.9316e-10
326	20	4.9331e-10
326.5	20	4.9316e-10
327	20	4.9296e-10
327.5	20	4.9305e-10
328	20	4.9325e-10
328.5	20	4.9314e-10
329	20	4.929e-10
329.5	20	4.9309e-10
330	20	4.929e-10
330.5	20	4.9308e-10
331	20	4.9305e-10
331.5	20	4.929e-10
332	20	4.926e-10
332.5	20	4.9291e-10
333	20	4.9272e-10
333.5	20	4.931e-10
334	20	4.9278e-10
334.5	20	4.9279e-10
335	20	4.9282e-10
335.5	20	4.9275e-10
336	20	4.926e-10
336.5	20	4.9276e-10
337	20	4.922e-10
337.5	20	4.9244e-10
338	20	4.922e-10
338.5	20	4.9238e-10
339	20	4.9226e-10
339.5	20	4.926e-10
340	20	4.9206e-10
340.5	20	4.9236e-10
341	20	4.9225e-10
341.5	20	4.9212e-10
342	20	4.9259e-10
342.5	20	4.9227e-10
343	20	4.9226e-10
343.5	20	4.9216e-10
344	20	4.9194e-10
344.5	20	4.9206e-10
345	20	4.9165e-10
345.5	20	4.9185e-10
346	20	4.9207e-10
346.5	20	4.9202e-10
347	20	4.9176e-10
347.5	20	4.9204e-10
348	20	4.9187e-10
348.5	20	4.9174e-10
349	20	4.9197e-10
349.5	20	4.9216e-10
350	20	4.9189e-10
350.5	20	4.921e-10
351	20	4.9188e-10
351.5	20	4.9187e-10
352	20	4.9163e-10
352.5	20	4.916e-10
353	20	4.918e-10
353.5	20	4.9163e-10
354	20	4.9179e-10
354.5	20	4.9184e-10
355	20	4.9148e-10
355.5	20	4.9178e-10
356	20	4.9115e-10
356.5	20	4.9184e-10
357	20	4.9128e-10
357.5	20	4.9131e-10
358	20	4.9151e-10
358.5	20	4.914e-10
359	20	4.9142e-10
359.5	20	4.9169e-10
360	20	4.9146e-10
360.5	20	4.9142e-10
361	20	4.9139e-10
361.5	20	4.9152e-10
362	20	4.9155e-10
362.5	20	4.9139e-10
363	20	4.9168e-10
363.5	20	4.914e-10
364	20	4.9109e-10
364.5	20	4.9119e-10
365	20	4.9144e-10
365.5	20	4.9113e-10
366	20	4.9119e-10
366.5	20	4.9118e-10
367	20	4.9118e-10
367.5	20	4.9133e-10
368	20	4.9102e-10
368.5	20	4.911e-10
369	20	4.91e-10
369.5	20	4.9072e-10
370	20	4.9109e-10
370.5	20	4.9075e-10
371	20	4.9115e-10
371.5	20	4.9112e-10
372	20	4.9088e-10
372.5	20	4.9102e-10
373	20	4.9089e-10
373.5	20	4.9062e-10
374	20	4.9081e-10
374.5	20	4.9082e-10
375	20	4.9088e-10
375.5	20	4.9088e-10
376	20	4.9079e-10
376.5	20	4.9087e-10
377	20	4.906e-10
377.5	20	4.9082e-10
378	20	4.9099e-10
378.5	20	4.9055e-10
379	20	4.9068e-10
379.5	20	4.9062e-10
380	20	4.9034e-10
380.5	20	4.9049e-10
381	20	4.9058e-10
381.5	20	4.9045e-10
382	20	4.9062e-10
382.5	20	4.9067e-10
383	20	4.9023e-10
383.5	20	4.9055e-10
384	20	4.9033e-10
384.5	20	4.9043e-10
385	20	4.9037e-10
385.5	20	4.9027e-10
386	20	4.9021e-10
386.5	20	4.9048e-10
387	20	4.9048e-10
387.5	20	4.9036e-10
388	20	4.902e-10
388.5	20	4.9025e-10
389	20	4.9031e-10
389.5	20	4.9023e-10
390	20	4.9029e-10
390.5	20	4.9031e-10
391	20	4.9037e-10
391.5	20	4.9037e-10
392	20	4.9052e-10
392.5	20	4.9042e-10
393	20	4.9018e-10
393.5	20	4.9015e-10
394	20	4.9014e-10
394.5	20	4.9014e-10
395	20	4.9009e-10
395.5	20	4.9044e-10
396	20	4.9018e-10
396.5	20	4.9009e-10
397	20	4.8999e-10
397.5	20	4.9041e-10
398	20	4.8995e-10
398.5	20	4.901e-10
399	20	4.9016e-10
399.5	20	4.9019e-10
400	20	4.9003e-10
400.5	20	4.899e-10
401	20	4.9014e-10
401.5	20	4.9043e-10
402	20	4.9002e-10
402.5	20	4.9029e-10
403	20	4.901e-10
403.5	20	4.9006e-10
404	20	4.8978e-10
404.5	20	4.8989e-10
405	20	4.9005e-10
405.5	20	4.8999e-10
406	20	4.899e-10
406.5	20	4.9004e-10
407	20	4.9004e-10
407.5	20	4.8995e-10
408	20	4.8983e-10
408.5	20	4.8982e-10
409	20	4.8982e-10
409.5	20	4.9008e-10
410	20	4.9011e-10
410.5	20	4.8996e-10
411	20	4.9e-10
411.5	20	4.9039e-10
412	20	4.8984e-10
412.5	20	4.8996e-10
413	20	4.8968e-10
413.5	20	4.8989e-10
414	20	4.8976e-10
414.5	20	4.9017e-10
415	20	4.8986e-10
415.5	20	4.8993e-10
416	20	4.899e-10
416.5	20	4.9017e-10
417	20	4.8985e-10
417.5	20	4.9011e-10
418	20	4.8997e-10
418.5	20	4.8993e-10
419	20	4.9006e-10
419.5	20	4.9012e-10
420	20	4.9003e-10
420.5	20	4.903e-10
421	20	4.9004e-10
421.5	20	4.8997e-10
422	20	4.903e-10
422.5	20	4.9024e-10
423	20	4.9007e-10
423.5	20	4.9034e-10
424	20	4.9011e-10
424.5	20	4.9028e-10
425	20	4.9033e-10
425.5	20	4.905e-10
426	20	4.9057e-10
426.5	20	4.9043e-10
427	20	4.9012e-10
427.5	20	4.9041e-10
428	20	4.9019e-10
428.5	20	4.9037e-10
429	20	4.9029e-10
429.5	20	4.9032e-10
430	20	4.9034e-10
430.5	20	4.9044e-10
431	20	4.9034e-10
431.5	20	4.9005e-10
432	20	4.9054e-10
432.5	20	4.9046e-10
433	20	4.9015e-10
433.5	20	4.9037e-10
434	20	4.9038e-10
434.5	20	4.9067e-10
435	20	4.9067e-10
435.5	20	4.9062e-10
436	20	4.9025e-10
436.5	20	4.9036e-10
437	20	4.9088e-10
437.5	20	4.9043e-10
438	20	4.9056e-10
438.5	20	4.9056e-10
439	20	4.9052e-10
439.5	20	4.9052e-10
440	20	4.907e-10
440.5	20	4.9076e-10
441	20	4.9021e-10
441.5	20	4.9066e-10
442	20	4.9045e-10
442.5	20	4.9071e-10
443	20	4.9073e-10
443.5	20	4.9036e-10
444	20	4.9064e-10
444.5	20	4.9076e-10
445	20	4.9054e-10
445.5	20	4.9069e-10
446	20	4.9059e-10
446.5	20	4.9041e-10
447	20	4.9051e-10
447.5	20	4.9029e-10
448	20	4.9043e-10
448.5	20	4.905e-10
449	20	4.9073e-10
449.5	20	4.905e-10
450	20	4.9062e-10
450.5	20	4.9063e-10
451	20	4.9045e-10
451.5	20	4.9062e-10
452	20	4.9052e-10
452.5	20	4.904e-10
453	20	4.9072e-10
453.5	20	4.9051e-10
454	20	4.9055e-10
454.5	20	4.9053e-10
455	20	4.9048e-10
455.5	20	4.9074e-10
456	20	4.9048e-10
456.5	20	4.9041e-10
457	20	4.9032e-10
457.5	20	4.9057e-10
458	20	4.9051e-10
458.5	20	4.9047e-10
459	20	4.9034e-10
459.5	20	4.9083e-10
460	20	4.9052e-10
460.5	20	4.9072e-10
461	20	4.9042e-10
461.5	20	4.9066e-10
462	20	4.9046e-10
462.5	20	4.9053e-10
463	20	4.9069e-10
463.5	20	4.9054e-10
464	20	4.9068e-10
464.5	20	4.9067e-10
465	20	4.9072e-10
465.5	20	4.9059e-10
466	20	4.9034e-10
466.5	20	4.907e-10
467	20	4.9062e-10
467.5	20	4.9058e-10
468	20	4.9094e-10
468.5	20	4.906e-10
469	20	4.9076e-10
469.5	20	4.9055e-10
470	20	4.9063e-10
470.5	20	4.9057e-10
471	20	4.9069e-10
471.5	20	4.9086e-10
472	20	4.9051e-10
472.5	20	4.9034e-10
473	20	4.9084e-10
473.5	20	4.9062e-10
474	20	4.9056e-10
474.5	20	4.9073e-10
475	20	4.9062e-10
475.5	20	4.907e-10
476	20	4.9079e-10
476.5	20	4.9054e-10
477	20	4.9069e-10
477.5	20	4.9064e-10
478	20	4.9076e-10
478.5	20	4.9073e-10
479	20	4.9076e-10
479.5	20	4.9078e-10
480	20	4.9067e-10
480.5	20	4.9082e-10
481	20	4.9081e-10
481.5	20	4.9099e-10
482	20	4.9064e-10
482.5	20	4.9075e-10
483	20	4.9081e-10
483.5	20	4.9073e-10
484	20	4.9105e-10
484.5	20	4.9081e-10
485	20	4.908e-10
485.5	20	4.909e-10
486	20	4.9082e-10
486.5	20	4.9086e-10
487	20	4.9085e-10
487.5	20	4.9071e-10
488	20	4.9088e-10
488.5	20	4.9077e-10
489	20	4.909e-10
489.5	20	4.906e-10
490	20	4.9083e-10
490.5	20	4.9098e-10
491	20	4.9099e-10
491.5	20	4.9078e-10
492	20	4.9075e-10
492.5	20	4.9076e-10
493	20	4.9111e-10
493.5	20	4.9096e-10
494	20	4.9094e-10
494.5	20	4.9087e-10
495	20	4.907e-10
495.5	20	4.9104e-10
496	20	4.9102e-10
496.5	20	4.9096e-10
497	20	4.9086e-10
497.5	20	4.9095e-10
498	20	4.9088e-10
498.5	20	4.9114e-10
499	20	4.9097e-10
499.5	20	4.911e-10
500	20	4.9098e-10
500.5	20	4.9114e-10
501	20	4.9087e-10
501.5	20	4.9107e-10
502	20	4.9096e-10
502.5	20	4.9106e-10
503	20	4.9119e-10
503.5	20	4.9084e-10
504	20	4.9094e-10
504.5	20	4.9127e-10
505	20	4.9076e-10
505.5	20	4.9092e-10
506	20	4.9089e-10
506.5	20	4.9074e-10
507	20	4.9109e-10
507.5	20	4.911e-10
508	20	4.9092e-10
508.5	20	4.9091e-10
509	20	4.91e-10
509.5	20	4.9116e-10
510	20	4.9092e-10
510.5	20	4.9105e-10
511	20	4.9087e-10
511.5	20	4.9102e-10
512	20	4.9121e-10
512.5	20	4.9111e-10
513	20	4.9099e-10
513.5	20	4.9088e-10
514	20	4.908e-10
514.5	20	4.909e-10
515	20	4.9113e-10
515.5	20	4.907e-10
516	20	4.9109e-10
516.5	20	4.9103e-10
517	20	4.9079e-10
517.5	20	4.9103e-10
518	20	4.9115e-10
518.5	20	4.9103e-10
519	20	4.9098e-10
519.5	20	4.9122e-10
520	20	4.9108e-10
520.5	20	4.9107e-10
521	20	4.9115e-10
521.5	20	4.9095e-10
522	20	4.9091e-10
522.5	20	4.9112e-10
523	20	4.9087e-10
523.5	20	4.9102e-10
524	20	4.9133e-10
524.5	20	4.9137e-10
525	20	4.9108e-10
525.5	20	4.9123e-10
526	20	4.9096e-10
526.5	20	4.912e-10
527	20	4.911e-10
527.5	20	4.9117e-10
528	20	4.912e-10
528.5	20	4.9159e-10
529	20	4.9162e-10
529.5	20	4.915e-10
530	20	4.9126e-10
530.5	20	4.9138e-10
531	20	4.9152e-10
531.5	20	4.9131e-10
532	20	4.9126e-10
532.5	20	4.9116e-10
533	20	4.9136e-10
533.5	20	4.912e-10
534	20	4.9126e-10
534.5	20	4.9163e-10
535	20	4.914e-10
535.5	20	4.9132e-10
536	20	4.9141e-10
536.5	20	4.9141e-10
537	20	4.9123e-10
537.5	20	4.9144e-10
538	20	4.9136e-10
538.5	20	4.9146e-10
539	20	4.9151e-10
539.5	20	4.9142e-10
540	20	4.9173e-10
540.5	20	4.9134e-10
541	20	4.9138e-10
541.5	20	4.9146e-10
542	20	4.9153e-10
542.5	20	4.9159e-10
543	20	4.9142e-10
543.5	20	4.9134e-10
544	20	4.919e-10
544.5	20	4.9167e-10
545	20	4.9156e-10
545.5	20	4.9175e-10
546	20	4.9145e-10
546.5	20	4.9197e-10
547	20	4.9164e-10
547.5	20	4.9171e-10
548	20	4.9151e-10
548.5	20	4.9193e-10
549	20	4.9199e-10
549.5	20	4.9202e-10
550	20	4.9185e-10
550.5	20	4.9198e-10
551	20	4.917e-10
551.5	20	4.9198e-10
552	20	4.9195e-10
552.5	20	4.9206e-10
553	20	4.9196e-10
553.5	20	4.9185e-10
554	20	4.9183e-10
554.5	20	4.9201e-10
555	20	4.9205e-10
555.5	20	4.9205e-10
556	20	4.918e-10
556.5	20	4.9201e-10
557	20	4.9186e-10
557.5	20	4.9201e-10
558	20	4.9194e-10
558.5	20	4.9208e-10
559	20	4.9194e-10
559.5	20	4.9191e-10
560	20	4.9186e-10
560.5	20	4.9194e-10
561	20	4.9194e-10
561.5	20	4.9195e-10
562	20	4.9187e-10
562.5	20	4.922e-10
563	20	4.9223e-10
563.5	20	4.92e-10
564	20	4.9214e-10
564.5	20	4.9194e-10
565	20	4.9198e-10
565.5	20	4.9227e-10
566	20	4.9223e-10
566.5	20	4.9209e-10
567	20	4.9219e-10
567.5	20	4.9232e-10
568	20	4.9204e-10
568.5	20	4.9234e-10
569	20	4.9233e-10
569.5	20	4.9238e-10
570	20	4.9189e-10
570.5	20	4.9227e-10
571	20	4.9235e-10
571.5	20	4.9208e-10
572	20	4.9222e-10
572.5	20	4.9248e-10
573	20	4.924e-10
573.5	20	4.9228e-10
574	20	4.9249e-10
574.5	20	4.9222e-10
575	20	4.9242e-10
575.5	20	4.9223e-10
576	20	4.9251e-10
576.5	20	4.9239e-10
577	20	4.9214e-10
577.5	20	4.9258e-10
578	20	4.9247e-10
578.5	20	4.9249e-10
579	20	4.9245e-10
579.5	20	4.9238e-10
580	20	4.9265e-10
580.5	20	4.9229e-10
581	20	4.9235e-10
581.5	20	4.9266e-10
582	20	4.9268e-10
582.5	20	4.929e-10
583	20	4.9275e-10
583.5	20	4.9241e-10
584	20	4.9249e-10
584.5	20	4.9248e-10
585	20	4.9248e-10
585.5	20	4.9247e-10
586	20	4.9246e-10
586.5	20	4.9248e-10
587	20	4.9254e-10
587.5	20	4.9255e-10
588	20	4.926e-10
588.5	20	4.9268e-10
589	20	4.9255e-10
589.5	20	4.9254e-10
590	20	4.9276e-10
590.5	20	4.924e-10
591	20	4.9259e-10
591.5	20	4.9249e-10
592	20	4.9251e-10
592.5	20	4.9254e-10
593	20	4.9276e-10
593.5	20	4.9254e-10
594	20	4.9294e-10
594.5	20	4.9283e-10
595	20	4.9284e-10
595.5	20	4.9281e-10
596	20	4.9249e-10
596.5	20	4.9267e-10
597	20	4.9267e-10
597.5	20	4.9257e-10
598	20	4.9254e-10
598.5	20	4.9265e-10
599	20	4.9277e-10
599.5	20	4.9256e-10
600	20	4.9243e-10
600.5	20	4.9275e-10
601	20	4.9281e-10
601.5	20	4.9292e-10
602	20	4.9304e-10
602.5	20	4.9274e-10
603	20	4.9294e-10
603.5	20	4.9276e-10
604	20	4.9296e-10
604.5	20	4.9283e-10
605	20	4.9284e-10
605.5	20	4.9295e-10
606	20	4.9281e-10
606.5	20	4.9283e-10
607	20	4.9288e-10
607.5	20	4.9281e-10
608	20	4.9253e-10
608.5	20	4.9275e-10
609	20	4.9317e-10
609.5	20	4.931e-10
610	20	4.9284e-10
610.5	20	4.9281e-10
611	20	4.9312e-10
611.5	20	4.928e-10
612	20	4.9316e-10
612.5	20	4.9318e-10
613	20	4.9303e-10
613.5	20	4.9286e-10
614	20	4.931e-10
614.5	20	4.9314e-10
615	20	4.9294e-10
615.5	20	4.9283e-10
616	20	4.9294e-10
616.5	20	4.9291e-10
617	20	4.9307e-10
617.5	20	4.9271e-10
618	20	4.9295e-10
618.5	20	4.9302e-10
619	20	4.9329e-10
619.5	20	4.9303e-10
620	20	4.9309e-10
620.5	20	4.9288e-10
621	20	4.9305e-10
621.5	20	4.9306e-10
622	20	4.9319e-10
622.5	20	4.932e-10
623	20	4.9343e-10
623.5	20	4.9322e-10
624	20	4.9327e-10
624.5	20	4.9331e-10
625	20	4.9316e-10
625.5	20	4.9314e-10
626	20	4.9321e-10
626.5	20	4.9322e-10
627	20	4.9338e-10
627.5	20	4.932e-10
628	20	4.9335e-10
628.5	20	4.9324e-10
629	20	4.9345e-10
629.5	20	4.9331e-10
630	20	4.9361e-10
630.5	20	4.9339e-10
631	20	4.9339e-10
631.5	20	4.9336e-10
632	20	4.9339e-10
632.5	20	4.9348e-10
633	20	4.9364e-10
633.5	20	4.9355e-10
634	20	4.9364e-10
634.5	20	4.9348e-10
635	20	4.9325e-10
635.5	20	4.9352e-10
636	20	4.9373e-10
636.5	20	4.9332e-10
637	20	4.9356e-10
637.5	20	4.9379e-10
638	20	4.9363e-10
638.5	20	4.9364e-10
639	20	4.9364e-10
639.5	20	4.9387e-10
640	20	4.9368e-10
640.5	20	4.9358e-10
641	20	4.9367e-10
641.5	20	4.9367e-10
642	20	4.9386e-10
642.5	20	4.9398e-10
643	20	4.9394e-10
643.5	20	4.9402e-10
644	20	4.9391e-10
644.5	20	4.9396e-10
645	20	4.9389e-10
645.5	20	4.9418e-10
646	20	4.9394e-10
646.5	20	4.9399e-10
647	20	4.9415e-10
647.5	20	4.9409e-10
648	20	4.9409e-10
648.5	20	4.9429e-10
649	20	4.9432e-10
649.5	20	4.9416e-10
650	20	4.9422e-10
650.5	20	4.942e-10
651	20	4.9432e-10
651.5	20	4.9406e-10
652	20	4.9396e-10
652.5	20	4.9413e-10
653	20	4.9433e-10
653.5	20	4.9431e-10
654	20	4.9405e-10
654.5	20	4.9423e-10
655	20	4.943e-10
655.5	20	4.9431e-10
656	20	4.9424e-10
656.5	20	4.9433e-10
657	20	4.9416e-10
657.5	20	4.9433e-10
658	20	4.9444e-10
658.5	20	4.944e-10
659	20	4.9445e-10
659.5	20	4.9451e-10
660	20	4.9418e-10
660.5	20	4.9443e-10
661	20	4.9455e-10
661.5	20	4.9451e-10
662	20	4.9458e-10
662.5	20	4.942e-10
663	20	4.9448e-10
663.5	20	4.9433e-10
664	20	4.9451e-10
664.5	20	4.947e-10
665	20	4.9444e-10
665.5	20	4.9464e-10
666	20	4.9427e-10
666.5	20	4.9423e-10
667	20	4.9451e-10
667.5	20	4.9476e-10
668	20	4.9461e-10
668.5	20	4.9478e-10
669	20	4.9474e-10
669.5	20	4.9459e-10
670	20	4.9476e-10
670.5	20	4.9474e-10
671	20	4.9464e-10
671.5	20	4.946e-10
672	20	4.9483e-10
672.5	20	4.9462e-10
673	20	4.9457e-10
673.5	20	4.9498e-10
674	20	4.9491e-10
674.5	20	4.9493e-10
675	20	4.9494e-10
675.5	20	4.951e-10
676	20	4.949e-10
676.5	20	4.951e-10
677	20	4.9508e-10
677.5	20	4.9497e-10
678	20	4.9502e-10
678.5	20	4.9496e-10
679	20	4.9519e-10
679.5	20	4.9503e-10
680	20	4.9507e-10
680.5	20	4.9506e-10
681	20	4.9508e-10
681.5	20	4.9515e-10
682	20	4.9494e-10
682.5	20	4.9548e-10
683	20	4.9559e-10
683.5	20	4.951e-10
684	20	4.9535e-10
684.5	20	4.9523e-10
685	20	4.953e-10
685.5	20	4.9543e-10
686	20	4.9537e-10
686.5	20	4.9541e-10
687	20	4.954e-10
687.5	20	4.9546e-10
688	20	4.9534e-10
688.5	20	4.9552e-10
689	20	4.9519e-10
689.5	20	4.9542e-10
690	20	4.9548e-10
690.5	20	4.9536e-10
691	20	4.9548e-10
691.5	20	4.9571e-10
692	20	4.9535e-10
692.5	20	4.9571e-10
693	20	4.9552e-10
693.5	20	4.953e-10
694	20	4.9552e-10
694.5	20	4.953e-10
695	20	4.9575e-10
695.5	20	4.955e-10
696	20	4.9576e-10
696.5	20	4.957e-10
697	20	4.9556e-10
697.5	20	4.9573e-10
698	20	4.9571e-10
698.5	20	4.9557e-10
699	20	4.9566e-10
699.5	20	4.9568e-10
700	20	4.9556e-10
700.5	20	4.9578e-10
701	20	4.9566e-10
701.5	20	4.9561e-10
702	20	4.9587e-10
702.5	20	4.9579e-10
703	20	4.9578e-10
703.5	20	4.9592e-10
704	20	4.9579e-10
704.5	20	4.9581e-10
705	20	4.9589e-10
705.5	20	4.957e-10
706	20	4.9566e-10
706.5	20	4.957e-10
707	20	4.956e-10
707.5	20	4.9569e-10
708	20	4.9576e-10
708.5	20	4.958e-10
709	20	4.9594e-10
709.5	20	4.9577e-10
710	20	4.9588e-10
710.5	20	4.9577e-10
711	20	4.9573e-10
711.5	20	4.9562e-10
712	20	4.9586e-10
712.5	20	4.9555e-10
713	20	4.9577e-10
713.5	20	4.9576e-10
714	20	4.9584e-10
714.5	20	4.9598e-10
715	20	4.9601e-10
715.5	20	4.9609e-10
716	20	4.958e-10
716.5	20	4.9592e-10
717	20	4.9574e-10
717.5	20	4.9591e-10
718	20	4.9556e-10
718.5	20	4.9583e-10
719	20	4.9564e-10
719.5	20	4.959e-10
720	20	4.9587e-10
720.5	20	4.9572e-10
721	20	4.9598e-10
721.5	20	4.956e-10
722	20	4.9587e-10
722.5	20	4.9596e-10
723	20	4.9573e-10
723.5	20	4.9613e-10
724	20	4.9606e-10
724.5	20	4.9604e-10
725	20	4.9612e-10
725.5	20	4.9581e-10
726	20	4.961e-10
726.5	20	4.9604e-10
727	20	4.9594e-10
727.5	20	4.959e-10
728	20	4.9569e-10
728.5	20	4.958e-10
729	20	4.9606e-10
729.5	20	4.9584e-10
730	20	4.9601e-10
730.5	20	4.9597e-10
731	20	4.9593e-10
731.5	20	4.9609e-10
732	20	4.9612e-10
732.5	20	4.9601e-10
733	20	4.9601e-10
733.5	20	4.9617e-10
734	20	4.9615e-10
734.5	20	4.9612e-10
735	20	4.963e-10
735.5	20	4.9628e-10
736	20	4.9649e-10
736.5	20	4.962e-10
737	20	4.9609e-10
737.5	20	4.9624e-10
738	20	4.9622e-10
738.5	20	4.965e-10
739	20	4.9618e-10
739.5	20	4.9625e-10
740	20	4.9624e-10
740.5	20	4.9654e-10
741	20	4.9649e-10
741.5	20	4.9643e-10
742	20	4.9634e-10
742.5	20	4.963e-10
743	20	4.9634e-10
743.5	20	4.9643e-10
744	20	4.966e-10
744.5	20	4.9646e-10
745	20	4.9645e-10
745.5	20	4.9661e-10
746	20	4.9639e-10
746.5	20	4.9663e-10
747	20	4.9672e-10
747.5	20	4.9663e-10
748	20	4.9662e-10
748.5	20	4.9656e-10
749	20	4.9657e-10
749.5	20	4.9647e-10
750	20	4.9666e-10
750.5	20	4.9653e-10
751	20	4.967e-10
751.5	20	4.9654e-10
752	20	4.9647e-10
752.5	20	4.9649e-10
753	20	4.9661e-10
753.5	20	4.9652e-10
754	20	4.9673e-10
754.5	20	4.967e-10
755	20	4.9691e-10
755.5	20	4.9686e-10
756	20	4.9712e-10
756.5	20	4.9686e-10
757	20	4.9701e-10
757.5	20	4.9676e-10
758	20	4.9685e-10
758.5	20	4.9669e-10
759	20	4.9686e-10
759.5	20	4.971e-10
760	20	4.9702e-10
760.5	20	4.97e-10
761	20	4.969e-10
761.5	20	4.9709e-10
762	20	4.9709e-10
762.5	20	4.9698e-10
763	20	4.9681e-10
763.5	20	4.9739e-10
764	20	4.9719e-10
764.5	20	4.9727e-10
765	20	4.9704e-10
765.5	20	4.9715e-10
766	20	4.9719e-10
766.5	20	4.9715e-10
767	20	4.97e-10
767.5	20	4.9715e-10
768	20	4.9726e-10
768.5	20	4.972e-10
769	20	4.9737e-10
769.5	20	4.9714e-10
770	20	4.9749e-10
770.5	20	4.9727e-10
771	20	4.9766e-10
771.5	20	4.9734e-10
772	20	4.9767e-10
772.5	20	4.9769e-10
773	20	4.9745e-10
773.5	20	4.9733e-10
774	20	4.9754e-10
774.5	20	4.9745e-10
775	20	4.9779e-10
775.5	20	4.9807e-10
776	20	4.9792e-10
776.5	20	4.9784e-10
777	20	4.9785e-10
777.5	20	4.9767e-10
778	20	4.9809e-10
778.5	20	4.9767e-10
779	20	4.9778e-10
779.5	20	4.9795e-10
780	20	4.9807e-10
780.5	20	4.9816e-10
781	20	4.9806e-10
781.5	20	4.9814e-10
782	20	4.9803e-10
782.5	20	4.9823e-10
783	20	4.9829e-10
783.5	20	4.9834e-10
784	20	4.9822e-10
784.5	20	4.9833e-10
785	20	4.9814e-10
785.5	20	4.9845e-10
786	20	4.9842e-10
786.5	20	4.9838e-10
787	20	4.984e-10
787.5	20	4.9858e-10
788	20	4.9848e-10
788.5	20	4.9871e-10
789	20	4.9839e-10
789.5	20	4.9844e-10
790	20	4.9853e-10
790.5	20	4.9838e-10
791	20	4.9854e-10
791.5	20	4.9879e-10
792	20	4.9876e-10
792.5	20	4.9847e-10
793	20	4.9831e-10
793.5	20	4.9865e-10
794	20	4.985e-10
794.5	20	4.9851e-10
795	20	4.9849e-10
795.5	20	4.9859e-10
796	20	4.9863e-10
796.5	20	4.9888e-10
797	20	4.9852e-10
797.5	20	4.9859e-10
798	20	4.9848e-10
798.5	20	4.9865e-10
799	20	4.9873e-10
799.5	20	4.9876e-10
800	20	4.9869e-10
800.5	20	4.9879e-10
801	20	4.9876e-10
801.5	20	4.985e-10
802	20	4.9877e-10
802.5	20	4.9898e-10
803	20	4.9887e-10
803.5	20	4.9906e-10
804	20	4.9909e-10
804.5	20	4.9891e-10
805	20	4.9898e-10
805.5	20	4.9887e-10
806	20	4.9897e-10
806.5	20	4.988e-10
807	20	4.9885e-10
807.5	20	4.994e-10
808	20	4.9928e-10
808.5	20	4.992e-10
809	20	4.9894e-10
809.5	20	4.9929e-10
810	20	4.9904e-10
810.5	20	4.9923e-10
811	20	4.9921e-10
811.5	20	4.9918e-10
812	20	4.9898e-10
812.5	20	4.9916e-10
813	20	4.9924e-10
813.5	20	4.9937e-10
814	20	4.9936e-10
814.5	20	4.9927e-10
815	20	4.9952e-10
815.5	20	4.9947e-10
816	20	4.9943e-10
816.5	20	4.9947e-10
817	20	4.993e-10
817.5	20	4.9939e-10
818	20	4.9962e-10
818.5	20	4.9977e-10
819	20	4.9974e-10
819.5	20	4.9963e-10
820	20	4.9969e-10
820.5	20	4.9957e-10
821	20	4.9947e-10
821.5	20	4.996e-10
822	20	4.9975e-10
822.5	20	4.9961e-10
823	20	4.997e-10
823.5	20	4.9957e-10
824	20	4.9986e-10
824.5	20	4.9958e-10
825	20	4.9954e-10
825.5	20	4.9989e-10
826	20	4.9961e-10
826.5	20	4.9951e-10
827	20	4.9983e-10
827.5	20	4.9997e-10
828	20	4.9962e-10
828.5	20	4.9964e-10
829	20	4.9982e-10
829.5	20	4.9986e-10
830	20	5.0007e-10
830.5	20	4.9986e-10
831	20	4.9967e-10
831.5	20	4.9994e-10
832	20	4.9963e-10
832.5	20	4.9988e-10
833	20	5.0002e-10
833.5	20	4.9995e-10
834	20	4.9982e-10
834.5	20	5.0022e-10
835	20	4.997e-10
835.5	20	5.0019e-10
836	20	5.0018e-10
836.5	20	4.9968e-10
837	20	5.0019e-10
837.5	20	5.0039e-10
838	20	5.0029e-10
838.5	20	5.0028e-10
839	20	5.0019e-10
839.5	20	5.0007e-10
840	20	5.0002e-10
840.5	20	5.001e-10
841	20	5.0015e-10
841.5	20	5.0003e-10
842	20	5.0018e-10
842.5	20	5.0014e-10
843	20	5.0016e-10
843.5	20	5.0022e-10
844	20	5.0012e-10
844.5	20	5.0024e-10
845	20	5.0016e-10
845.5	20	5.0029e-10
846	20	5.0037e-10
846.5	20	5.0034e-10
847	20	5.0034e-10
847.5	20	5.0029e-10
848	20	5.0066e-10
848.5	20	5.0035e-10
849	20	5.0017e-10
849.5	20	5.0053e-10
850	20	5.0044e-10
850.5	20	5.0051e-10
851	20	5.0027e-10
851.5	20	5.002e-10
852	20	5.0076e-10
852.5	20	5.0047e-10
853	20	5.0054e-10
853.5	20	5.0055e-10
854	20	5.0051e-10
854.5	20	5.0058e-10
855	20	5.0081e-10
855.5	20	5.0073e-10
856	20	5.0102e-10
856.5	20	5.0087e-10
857	20	5.0063e-10
857.5	20	5.0078e-10
858	20	5.0088e-10
858.5	20	5.0086e-10
859	20	5.0073e-10
859.5	20	5.0084e-10
860	20	5.0094e-10
860.5	20	5.0084e-10
861	20	5.0089e-10
861.5	20	5.0081e-10
862	20	5.0128e-10
862.5	20	5.0094e-10
863	20	5.0092e-10
863.5	20	5.0083e-10
864	20	5.0115e-10
864.5	20	5.0083e-10
865	20	5.0102e-10
865.5	20	5.0106e-10
866	20	5.0119e-10
866.5	20	5.011e-10
867	20	5.0124e-10
867.5	20	5.0087e-10
868	20	5.0137e-10
868.5	20	5.0111e-10
869	20	5.0141e-10
869.5	20	5.0126e-10
870	20	5.0111e-10
870.5	20	5.0114e-10
871	20	5.0123e-10
871.5	20	5.0132e-10
872	20	5.0124e-10
872.5	20	5.0172e-10
873	20	5.0142e-10
873.5	20	5.0129e-10
874	20	5.0142e-10
874.5	20	5.0168e-10
875	20	5.0113e-10
875.5	20	5.0145e-10
876	20	5.0171e-10
876.5	20	5.0152e-10
877	20	5.0162e-10
877.5	20	5.0134e-10
878	20	5.0141e-10
878.5	20	5.0154e-10
879	20	5.0174e-10
879.5	20	5.0181e-10
880	20	5.019e-10
880.5	20	5.0137e-10
881	20	5.017e-10
881.5	20	5.0174e-10
882	20	5.0153e-10
882.5	20	5.0188e-10
883	20	5.0178e-10
883.5	20	5.0159e-10
884	20	5.0142e-10
884.5	20	5.0156e-10
885	20	5.0183e-10
885.5	20	5.0178e-10
886	20	5.0186e-10
886.5	20	5.0169e-10
887	20	5.0192e-10
887.5	20	5.0219e-10
888	20	5.0164e-10
888.5	20	5.02e-10
889	20	5.0157e-10
889.5	20	5.0176e-10
890	20	5.0214e-10
890.5	20	5.0176e-10
891	20	5.0202e-10
891.5	20	5.0223e-10
892	20	5.0188e-10
892.5	20	5.0222e-10
893	20	5.0214e-10
893.5	20	5.0183e-10
894	20	5.0177e-10
894.5	20	5.0215e-10
895	20	5.0224e-10
895.5	20	5.0185e-10
896	20	5.0217e-10
896.5	20	5.0205e-10
897	20	5.0226e-10
897.5	20	5.0183e-10
898	20	5.0213e-10
898.5	20	5.024e-10
899	20	5.0205e-10
899.5	20	5.0184e-10
900	20	5.0201e-10
900.5	20	5.0239e-10
901	20	5.0238e-10
901.5	20	5.0208e-10
902	20	5.0205e-10
902.5	20	5.0214e-10
903	20	5.0246e-10
903.5	20	5.0228e-10
904	20	5.0245e-10
904.5	20	5.0235e-10
905	20	5.0262e-10
905.5	20	5.0235e-10
906	20	5.0231e-10
906.5	20	5.0272e-10
907	20	5.0263e-10
907.5	20	5.0273e-10
908	20	5.027e-10
908.5	20	5.0261e-10
909	20	5.0286e-10
909.5	20	5.0264e-10
910	20	5.0253e-10
910.5	20	5.0305e-10
911	20	5.0261e-10
911.5	20	5.0264e-10
912	20	5.0296e-10
912.5	20	5.0269e-10
913	20	5.0293e-10
913.5	20	5.0271e-10
914	20	5.0314e-10
914.5	20	5.0294e-10
915	20	5.0288e-10
915.5	20	5.028e-10
916	20	5.0289e-10
916.5	20	5.0312e-10
917	20	5.0318e-10
917.5	20	5.0314e-10
918	20	5.0316e-10
918.5	20	5.0304e-10
919	20	5.0321e-10
919.5	20	5.0325e-10
920	20	5.0356e-10
920.5	20	5.0357e-10
921	20	5.0352e-10
921.5	20	5.0331e-10
922	20	5.0349e-10
922.5	20	5.0324e-10
923	20	5.0334e-10
923.5	20	5.0327e-10
924	20	5.035e-10
924.5	20	5.0356e-10
925	20	5.0341e-10
925.5	20	5.0336e-10
926	20	5.0348e-10
926.5	20	5.0361e-10
927	20	5.0353e-10
927.5	20	5.0383e-10
928	20	5.0367e-10
928.5	20	5.0386e-10
929	20	5.0385e-10
929.5	20	5.0373e-10
930	20	5.0367e-10
930.5	20	5.0388e-10
931	20	5.0355e-10
931.5	20	5.0402e-10
932	20	5.0373e-10
932.5	20	5.0396e-10
933	20	5.0386e-10
933.5	20	5.0389e-10
934	20	5.0393e-10
934.5	20	5.0378e-10
935	20	5.0373e-10
935.5	20	5.0372e-10
936	20	5.0392e-10
936.5	20	5.0397e-10
937	20	5.04e-10
937.5	20	5.0372e-10
938	20	5.0398e-10
938.5	20	5.0418e-10
939	20	5.0394e-10
939.5	20	5.0444e-10
940	20	5.0433e-10
940.5	20	5.0425e-10
941	20	5.0401e-10
941.5	20	5.0415e-10
942	20	5.0421e-10
942.5	20	5.0414e-10
943	20	5.0444e-10
943.5	20	5.0432e-10
944	20	5.0412e-10
944.5	20	5.042e-10
945	20	5.0448e-10
945.5	20	5.0455e-10
946	20	5.0468e-10
946.5	20	5.0407e-10
947	20	5.0447e-10
947.5	20	5.0457e-10
948	20	5.045e-10
948.5	20	5.0423e-10
949	20	5.0464e-10
949.5	20	5.047e-10
950	20	5.0425e-10
950.5	20	5.046e-10
951	20	5.0451e-10
951.5	20	5.0486e-10
952	20	5.0444e-10
952.5	20	5.0476e-10
953	20	5.0462e-10
953.5	20	5.0465e-10
954	20	5.0457e-10
954.5	20	5.0489e-10
955	20	5.0468e-10
955.5	20	5.0464e-10
956	20	5.0446e-10
956.5	20	5.0495e-10
957	20	5.0451e-10
957.5	20	5.0479e-10
958	20	5.0501e-10
958.5	20	5.0463e-10
959	20	5.05e-10
959.5	20	5.0482e-10
960	20	5.0497e-10
960.5	20	5.0487e-10
961	20	5.047e-10
961.5	20	5.0511e-10
962	20	5.0502e-10
962.5	20	5.0496e-10
963	20	5.0523e-10
963.5	20	5.0513e-10
964	20	5.049e-10
964.5	20	5.0502e-10
965	20	5.0506e-10
965.5	20	5.0508e-10
966	20	5.0512e-10
966.5	20	5.0491e-10
967	20	5.0524e-10
967.5	20	5.0522e-10
968	20	5.0517e-10
968.5	20	5.0512e-10
969	20	5.0535e-10
969.5	20	5.0508e-10
970	20	5.0538e-10
970.5	20	5.0538e-10
971	20	5.0529e-10
971.5	20	5.0527e-10
972	20	5.0549e-10
972.5	20	5.0523e-10
973	20	5.0552e-10
973.5	20	5.0523e-10
974	20	5.0552e-10
974.5	20	5.0514e-10
975	20	5.054e-10
975.5	20	5.0533e-10
976	20	5.0548e-10
976.5	20	5.0567e-10
977	20	5.0567e-10
977.5	20	5.0545e-10
978	20	5.0542e-10
978.5	20	5.057e-10
979	20	5.0541e-10
979.5	20	5.0599e-10
980	20	5.0572e-10
980.5	20	5.0593e-10
981	20	5.0616e-10
981.5	20	5.0606e-10
982	20	5.0604e-10
982.5	20	5.0603e-10
983	20	5.0596e-10
983.5	20	5.0591e-10
984	20	5.0602e-10
984.5	20	5.0582e-10
985	20	5.0604e-10
985.5	20	5.0581e-10
986	20	5.0637e-10
986.5	20	5.0579e-10
987	20	5.058e-10
987.5	20	5.0583e-10
988	20	5.0598e-10
988.5	20	5.0611e-10
989	20	5.0594e-10
989.5	20	5.0621e-10
990	20	5.062e-10
990.5	20	5.0611e-10
991	20	5.059e-10
991.5	20	5.061e-10
992	20	5.0647e-10
992.5	20	5.0619e-10
993	20	5.0609e-10
993.5	20	5.0644e-10
994	20	5.062e-10
994.5	20	5.0651e-10
995	20	5.0654e-10
995.5	20	5.0623e-10
996	20	5.0642e-10
996.5	20	5.0656e-10
997	20	5.0654e-10
997.5	20	5.0628e-10
998	20	5.0646e-10
998.5	20	5.0663e-10
999	20	5.0673e-10
999.5	20	5.0651e-10
[truncated: 6,164 more rows]
