# Supplementary material for: Ultralow detection limit and high sensitivity X-ray detector of high-quality MAPbBr3 perovskite single crystals
Source: Royal Society of Chemistry journal article supplement (doi:10.1039/d4ta00492b), 2024-01-01
Supplement: d4ta00492b2.xlsx [file d4ta00492b2.xlsx]

## Sheet: Sheet1
time (s)	electric field (V cm-1)	dark current (A)
0	20	4.7316e-10
0.5	20	4.7368e-10
1	20	4.7368e-10
1.5	20	4.7366e-10
2	20	4.7365e-10
2.5	20	4.7357e-10
3	20	4.7366e-10
3.5	20	4.7365e-10
4	20	4.7352e-10
4.5	20	4.7355e-10
5	20	4.735e-10
5.5	20	4.7353e-10
6	20	4.7345e-10
6.5	20	4.7336e-10
7	20	4.7349e-10
7.5	20	4.7354e-10
8	20	4.7351e-10
8.5	20	4.7357e-10
9	20	4.7344e-10
9.5	20	4.7328e-10
10	20	4.7334e-10
10.5	20	4.7359e-10
11	20	4.7358e-10
11.5	20	4.737e-10
12	20	4.7386e-10
12.5	20	4.7364e-10
13	20	4.7369e-10
13.5	20	4.7366e-10
14	20	4.7358e-10
14.5	20	4.7364e-10
15	20	4.7378e-10
15.5	20	4.7343e-10
16	20	4.7326e-10
16.5	20	4.7318e-10
17	20	4.7341e-10
17.5	20	4.7332e-10
18	20	4.7316e-10
18.5	20	4.7307e-10
19	20	4.7327e-10
19.5	20	4.7305e-10
20	20	4.7316e-10
20.5	20	4.7294e-10
21	20	4.7323e-10
21.5	20	4.7316e-10
22	20	4.7314e-10
22.5	20	4.7309e-10
23	20	4.7291e-10
23.5	20	4.7298e-10
24	20	4.73e-10
24.5	20	4.7316e-10
25	20	4.7307e-10
25.5	20	4.7311e-10
26	20	4.7338e-10
26.5	20	4.7366e-10
27	20	4.7374e-10
27.5	20	4.7338e-10
28	20	4.7339e-10
28.5	20	4.7352e-10
29	20	4.7355e-10
29.5	20	4.7351e-10
30	20	4.7372e-10
30.5	20	4.7339e-10
31	20	4.7297e-10
31.5	20	4.7303e-10
32	20	4.7315e-10
32.5	20	4.7275e-10
33	20	4.7298e-10
33.5	20	4.7278e-10
34	20	4.7268e-10
34.5	20	4.7298e-10
35	20	4.7262e-10
35.5	20	4.7242e-10
36	20	4.7256e-10
36.5	20	4.7271e-10
37	20	4.7274e-10
37.5	20	4.7269e-10
38	20	4.7254e-10
38.5	20	4.727e-10
39	20	4.7265e-10
39.5	20	4.7268e-10
40	20	4.7248e-10
40.5	20	4.7235e-10
41	20	4.7314e-10
41.5	20	4.7331e-10
42	20	4.7323e-10
42.5	20	4.7346e-10
43	20	4.7377e-10
43.5	20	4.7352e-10
44	20	4.7341e-10
44.5	20	4.7334e-10
45	20	4.7345e-10
45.5	20	4.7382e-10
46	20	4.7298e-10
46.5	20	4.7302e-10
47	20	4.7264e-10
47.5	20	4.7265e-10
48	20	4.7264e-10
48.5	20	4.7287e-10
49	20	4.7239e-10
49.5	20	4.7252e-10
50	20	4.725e-10
50.5	20	4.7281e-10
51	20	4.7254e-10
51.5	20	4.7227e-10
52	20	4.7242e-10
52.5	20	4.7249e-10
53	20	4.7263e-10
53.5	20	4.7255e-10
54	20	4.7262e-10
54.5	20	4.7255e-10
55	20	4.7253e-10
55.5	20	4.7285e-10
56	20	4.7364e-10
56.5	20	4.7354e-10
57	20	4.736e-10
57.5	20	4.7375e-10
58	20	4.7361e-10
58.5	20	4.7419e-10
59	20	4.738e-10
59.5	20	4.7385e-10
60	20	4.7402e-10
60.5	20	4.7357e-10
61	20	4.7315e-10
61.5	20	4.7284e-10
62	20	4.7291e-10
62.5	20	4.7263e-10
63	20	4.7263e-10
63.5	20	4.7268e-10
64	20	4.7266e-10
64.5	20	4.7268e-10
65	20	4.7264e-10
65.5	20	4.7258e-10
66	20	4.7297e-10
66.5	20	4.7242e-10
67	20	4.7264e-10
67.5	20	4.7305e-10
68	20	4.726e-10
68.5	20	4.7262e-10
69	20	4.7257e-10
69.5	20	4.7269e-10
70	20	4.728e-10
70.5	20	4.7321e-10
71	20	4.7431e-10
71.5	20	4.7456e-10
72	20	4.7471e-10
72.5	20	4.7478e-10
73	20	4.7498e-10
73.5	20	4.7475e-10
74	20	4.7486e-10
74.5	20	4.7523e-10
75	20	4.7496e-10
75.5	20	4.7434e-10
76	20	4.7344e-10
76.5	20	4.7329e-10
77	20	4.7304e-10
77.5	20	4.7287e-10
78	20	4.7294e-10
78.5	20	4.7326e-10
79	20	4.7304e-10
79.5	20	4.7301e-10
80	20	4.7276e-10
80.5	20	4.7268e-10
81	20	4.7278e-10
81.5	20	4.7316e-10
82	20	4.7289e-10
82.5	20	4.7289e-10
83	20	4.7306e-10
83.5	20	4.7301e-10
84	20	4.7302e-10
84.5	20	4.727e-10
85	20	4.7334e-10
85.5	20	4.7277e-10
86	20	4.7304e-10
86.5	20	4.7313e-10
87	20	4.7288e-10
87.5	20	4.7289e-10
88	20	4.7292e-10
88.5	20	4.7293e-10
89	20	4.7296e-10
89.5	20	4.7313e-10
90	20	4.7295e-10
