# Supplementary material for: Ultralow detection limit and high sensitivity X-ray detector of high-quality MAPbBr3 perovskite single crystals
Source: Royal Society of Chemistry journal article supplement (doi:10.1039/d4ta00492b), 2024-01-01
Supplement: d4ta00492b3.pdf [file d4ta00492b3.pdf]

## Supplementary Information

### Ultralow detection limit and high sensitivity X-ray detector of high-quality MAPbBr<sub>3</sub> perovskite single crystals

Dong Liu<sup>a</sup>, Xue Sun<sup>b</sup>, Li Jiang<sup>a</sup>, Xianyuan Jiang<sup>c</sup>, Hao Chen<sup>d</sup>, Fucai Cui<sup>b</sup>, Guodong Zhang<sup>\*b</sup>, Yong Wang<sup>a</sup>, Ying-Bo Lu<sup>a</sup>, Zhongchen Wu<sup>\*a</sup>, Zhijun Ning<sup>c</sup>, and Xutang Tao<sup>b</sup>

<sup>a</sup> School of Space Science and Physics, Institute of Space Sciences, Shandong University, Weihai 264209, China.

<sup>b</sup> State Key Laboratory of Crystal Materials, Institute of Crystal Materials, Shandong University, Jinan 250100, China.

<sup>c</sup> School of Physical Science and Technology, ShanghaiTech University, Shanghai 201210, China.

<sup>d</sup> The Edward S. Rogers Department of Electrical and Computer Engineering, University of Toronto, Toronto, Ontario M5S 3G4, Canada.

† Electronic Supplementary Information (ESI) available.

\* **Corresponding authors:** z.c.wu@sdu.edu.cn; zgd@sdu.edu.cn.

### Equation S1

The dark current drift, which is used to evaluate the degree of dark current drift, is expressed as:

$$Drift = \frac{J_t - J_0}{t \cdot E}$$

where  $J_t$  and  $J_0$  are the current densities at the beginning and end points, respectively;  $E$  is the electric field; and  $t$  is the duration.

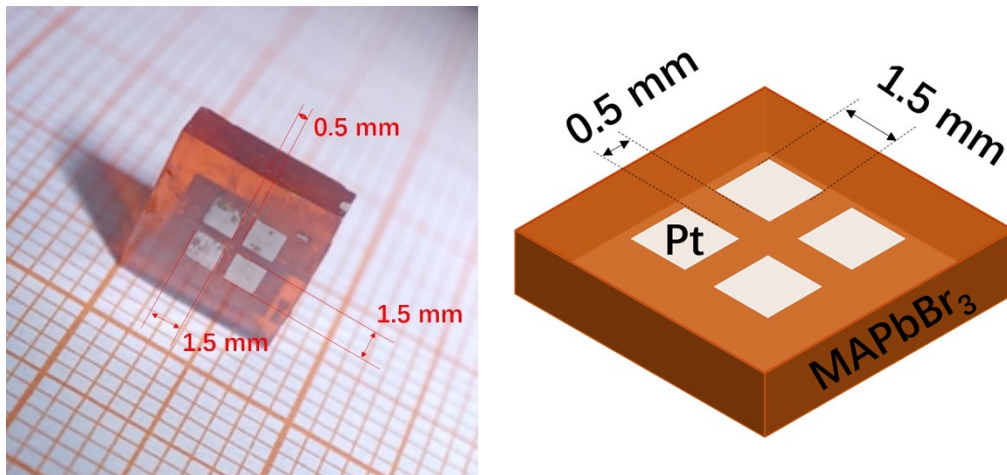

**Fig. S1.** Photograph of the VEC-MAPbBr<sub>3</sub> single crystal device structure.

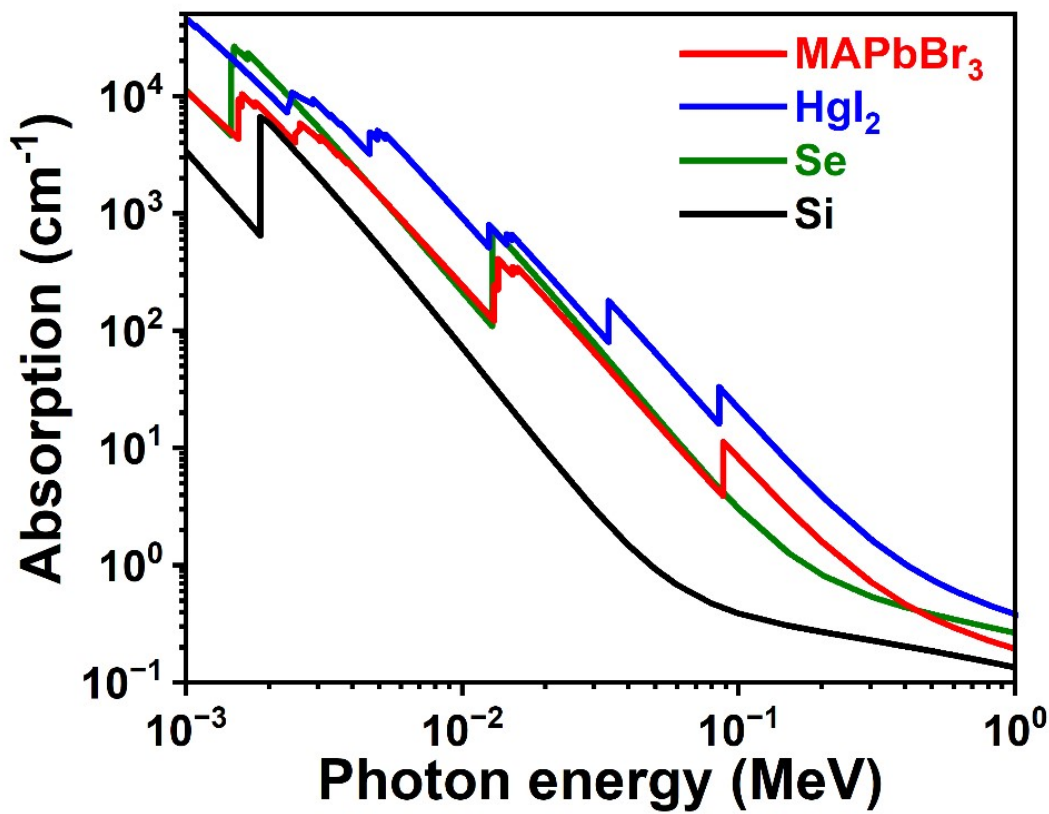

Fig. S2. Linear absorption coefficients of MAPbBr<sub>3</sub>, Hgl<sub>2</sub>, Se, and Si as a function of photo energy from 0.001 to 1 MeV.

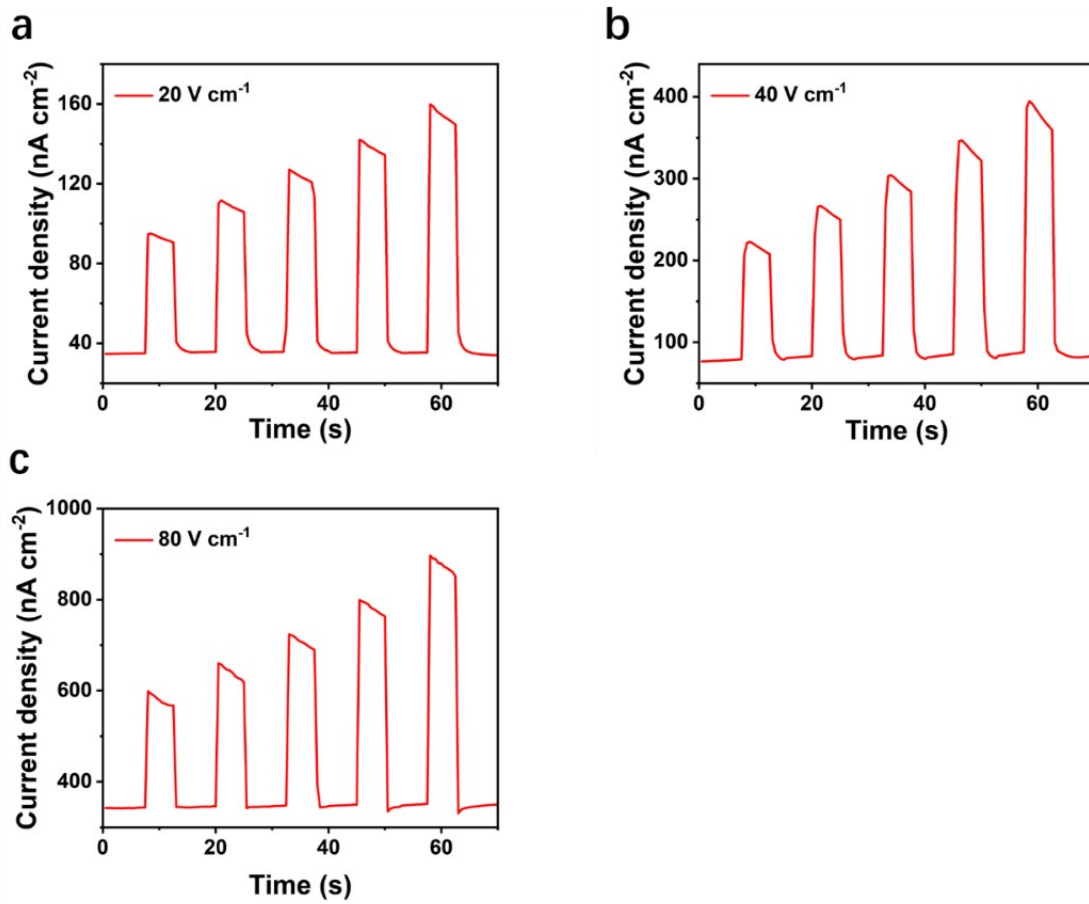

**Fig. S3.** Photocurrent-dose rate curves of the LPAC-MAPbBr<sub>3</sub> detector at electric fields strengths of 20, 40, and 80 V cm<sup>-1</sup>.

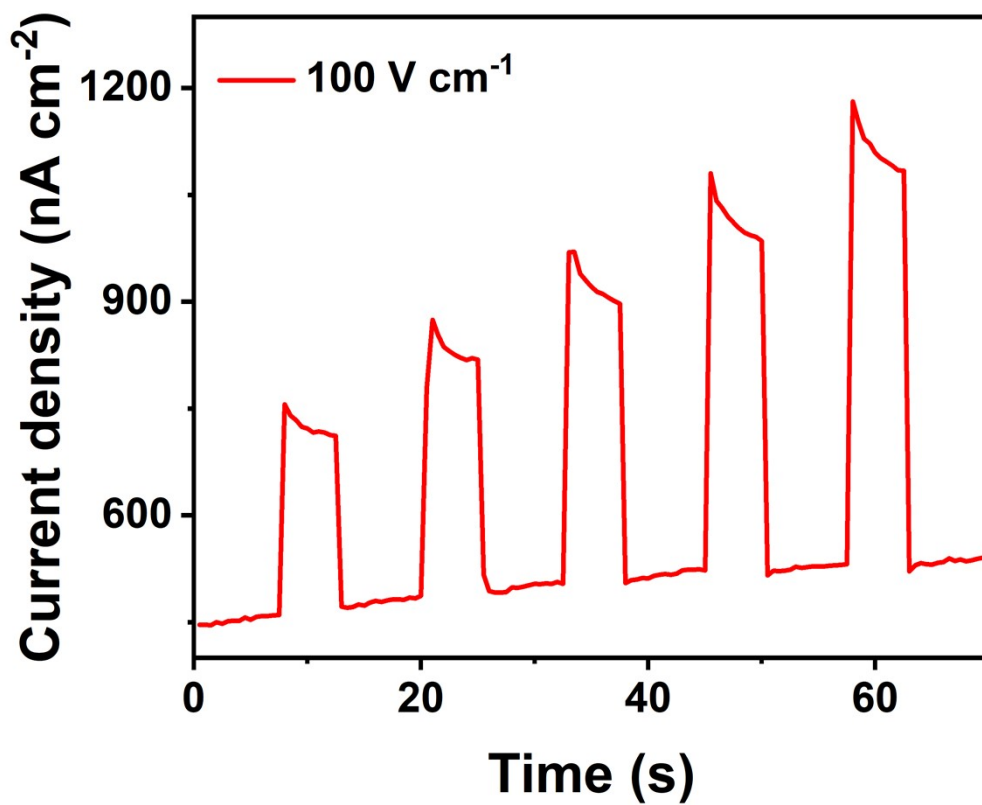

Fig. S4. Photocurrent-dose rate curves of the detector at an electric field strength of 100 V cm<sup>-1</sup>.

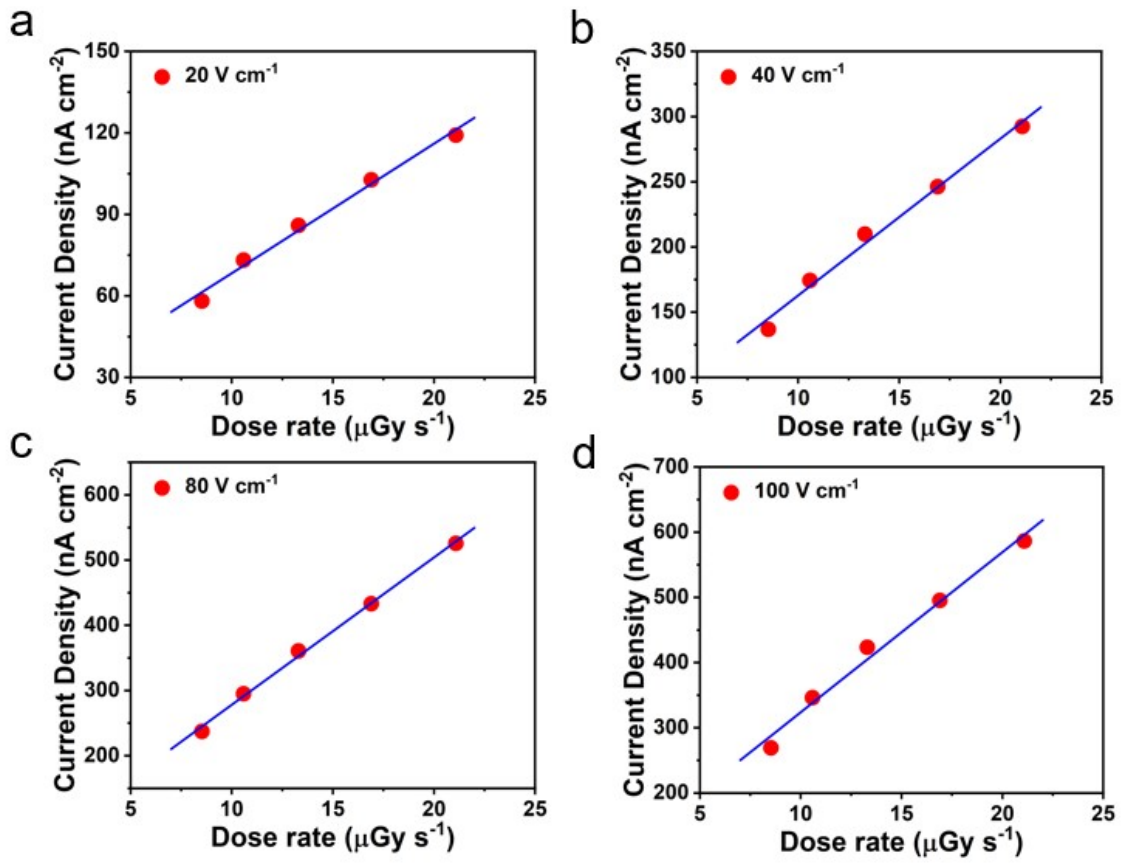

Fig. S5. Photocurrent response of the detector at different electric field strengths and various dose rates under 100 kV<sub>p</sub> X-ray illumination.

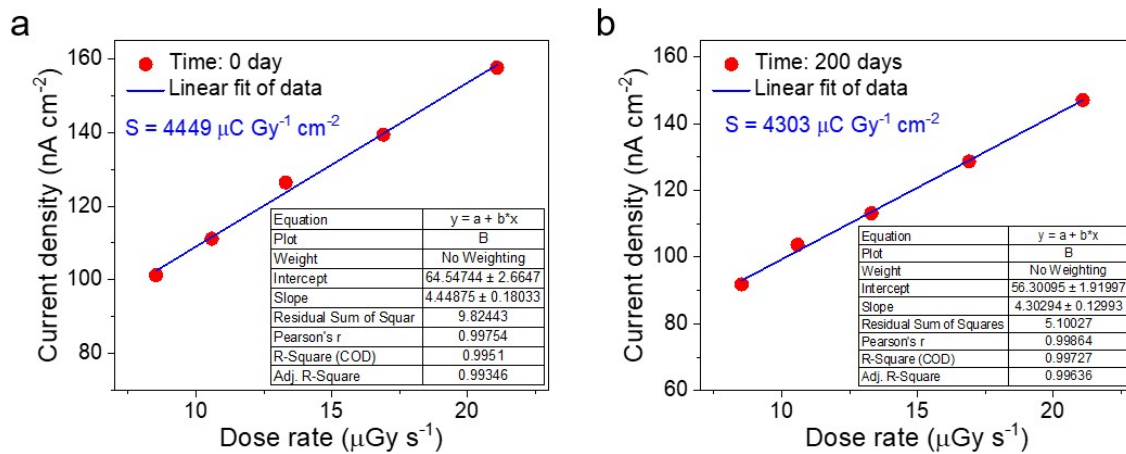

**Fig. S6.** Photocurrent response of the detector was assessed under 100 kV<sub>p</sub> X-ray illumination at various dose rates, and the sensitivities were evaluated on day 0 and day 200.

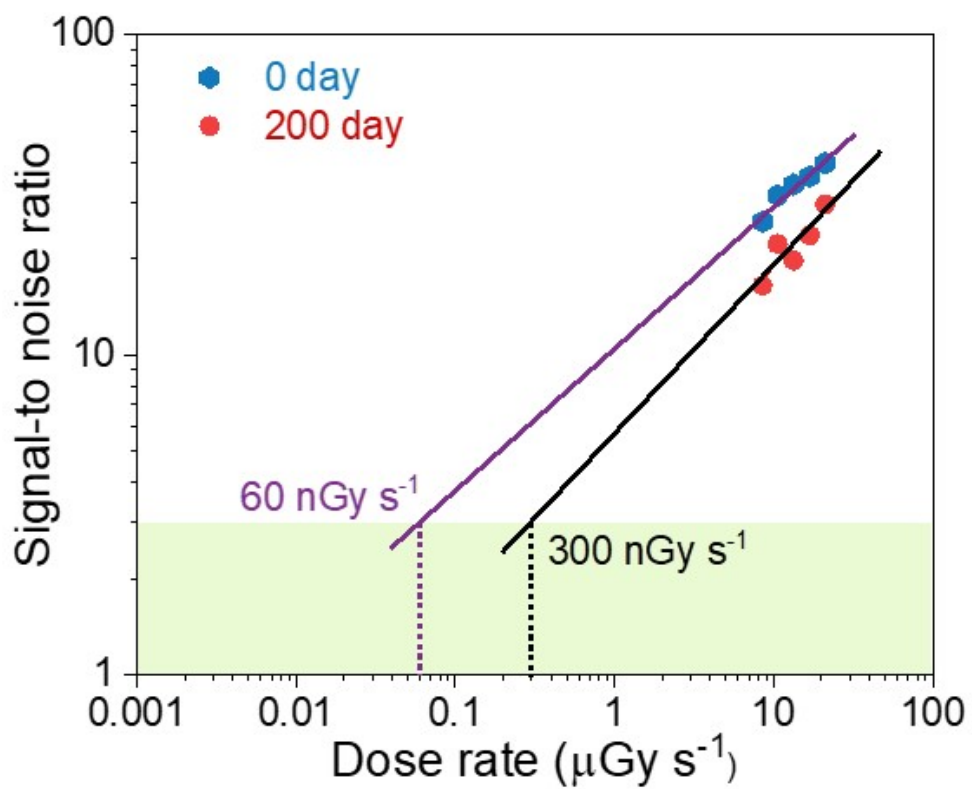

Fig. S7. Signal-to-noise ratio of the VEC-MAPbBr<sub>3</sub> SC detector on day 0 and day 200.



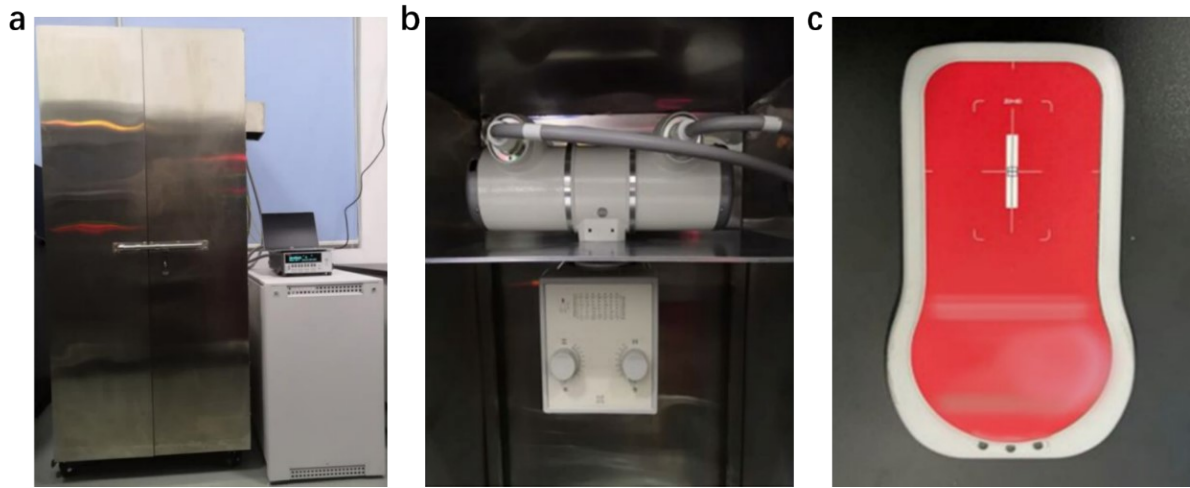

**Fig. S8.** Photographs of (a) the X-ray-generating and shielding device, (b) the X-ray tube and beam limiter, and (c) the Piranha 655 X-ray machine multifunctional quality detector.

**Table S1.** Summary of detailed fitting parameters of time-resolved photoluminescence (TRPL) spectroscopy for VEC-MAPbBr<sub>3</sub> and HT- MAPbBr<sub>3</sub>.

| Sample   | VEC-MAPbBr <sub>3</sub>                                           | HT- MAPbBr <sub>3</sub>   |
|----------|-------------------------------------------------------------------|---------------------------|
| Model    | ExpDec2                                                           |                           |
| Equation | $y = A_1 e^{-\frac{x}{\tau_1}} + A_2 e^{-\frac{x}{\tau_2}} + y_0$ |                           |
| $y_0$    | $8.5657 \pm 1.77196$                                              | $4.94962 \pm 0.85886$     |
| $A_1$    | $2006.22578 \pm 13.05686$                                         | $1947.27637 \pm 17.06467$ |
| $\tau_1$ | $154.4088 \pm 1.86672$                                            | $143.61114 \pm 1.75293$   |
| $A_2$    | $330.27302 \pm 11.48534$                                          | $377.08082 \pm 17.51037$  |
| $\tau_2$ | $1149.76857 \pm 49.00642$                                         | $683.35276 \pm 24.72292$  |

**Table S2.** The detailed fitting results of the  $I$ - $V$  curve for VEC-MAPbBr<sub>3</sub> single crystal.

| VEC-MAPbBr <sub>3</sub> single crystal |                        |                        |                       |
|----------------------------------------|------------------------|------------------------|-----------------------|
| Regimes                                | n = 1                  | n > 3                  | n = 2                 |
| Equation                               | $y = a + b \cdot x$    | $y = a + b \cdot x$    | $y = a + b \cdot x$   |
| Intercept                              | $-8.75046 \pm 0.01478$ | $-11.3941 \pm 0.09745$ | $-8.2387 \pm 0.01255$ |
| Slope                                  | $0.62977 \pm 0.03057$  | $3.76295 \pm 0.07651$  | $1.56053 \pm 0.00687$ |
| Residual Sum of Squares                | 8.54E-04               | 0.06082                | 0.00264               |
| Pearson's r                            | 0.99649                | 0.99589                | 0.99941               |
| R-Square (COD)                         | 0.99298                | 0.9918                 | 0.99882               |
| Adj. R-Square                          | 0.99064                | 0.99139                | 0.9988                |

**Table S3.** The detailed fitting results of the  $I$ - $V$  curve for HT-MAPbBr<sub>3</sub> single crystal.

| HT-MAPbBr <sub>3</sub> single crystal |                        |                       |                        |
|---------------------------------------|------------------------|-----------------------|------------------------|
| Regimes                               | n = 1                  | n > 3                 | n = 2                  |
| Equation                              | $y = a + b \cdot x$    | $y = a + b \cdot x$   | $y = a + b \cdot x$    |
| Intercept                             | $-8.00305 \pm 0.00875$ | $-9.47216 \pm 0.0285$ | $-8.38832 \pm 0.03839$ |
| Slope                                 | $0.92236 \pm 0.0111$   | $2.13839 \pm 0.01935$ | $1.51949 \pm 0.02021$  |
| Residual Sum of Squares               | 0.00146                | 0.00401               | 0.00278                |
| Pearson's r                           | 0.99928                | 0.99894               | 0.99657                |
| R-Square (COD)                        | 0.99855                | 0.99788               | 0.99315                |
| Adj. R-Square                         | 0.99841                | 0.99779               | 0.99297                |

**Table S4.** Summary of MAPbBr<sub>3</sub> SC properties and photodetector performances of resulting X-ray detectors in published representative work.

| Ref. | Methods    | FWHM of rocking curve (°) | E <sub>g</sub> (eV) | PL peak (nm) | $\tau$ (ns) | $n_{\text{trap}}$ ( $\times 10^9 \text{ cm}^{-3}$ ) | Mobility $\mu$ ( $\text{cm}^2\text{V}^{-1}\text{s}^{-1}$ ) | Lowest detectable dose rate ( $\mu\text{Gy}\cdot\text{S}^{-1}$ ) | Sensitivity ( $\mu\text{C Gy}^{-1}\text{cm}^{-2}$ ) |
|------|------------|---------------------------|---------------------|--------------|-------------|-----------------------------------------------------|------------------------------------------------------------|------------------------------------------------------------------|-----------------------------------------------------|
| [1]  | LDSC.1     | 0.0096 (200)              | 2.15                | 577          | 997         | 4.4                                                 |                                                            | 1.2                                                              | 184.6                                               |
| [2]  | LDSC.2     | 0.0096 (100)              | 2.18                | 577          | 1099        | 4.5                                                 | 88.6                                                       |                                                                  | 2181                                                |
| [3]  | LTGC.1     | 0.013 (200)               | 2.24                | 545          | 962         | 5.2                                                 | 81                                                         |                                                                  |                                                     |
| [4]  | LTGC.2     | 0.019 (100)               | 2.24                | 547          | 897         | 6.7                                                 | 83.9                                                       |                                                                  |                                                     |
| [5]  | PA-ITC.1   | 0.008 (200)               |                     | 533          | 44.87       |                                                     |                                                            | 0.087                                                            | 15280                                               |
| [6]  | PA-ITC.2   | 0.127 (100)               | 2.23                | 546          | 923         | 6.6                                                 | 39                                                         |                                                                  |                                                     |
| [7]  | SL-ITC     |                           | 2.16                |              | 17.14       | 16.9                                                | 60                                                         |                                                                  | 632                                                 |
| [8]  | RT-ITC     | 0.0253                    | 2.29                |              |             | 6.59                                                | 18                                                         |                                                                  |                                                     |
|      | ZT-ITC     | 0.0179                    |                     |              |             | 3.06                                                | 6                                                          |                                                                  |                                                     |
|      | LT-ITC     | 0.0171                    |                     |              |             | 2.55                                                | 115                                                        |                                                                  |                                                     |
| [9]  | AVC.1      |                           | 2.21                | 570          | 978         | 5.8                                                 | 115                                                        |                                                                  |                                                     |
| [10] | AVC.2      |                           |                     | 550          |             |                                                     | 217                                                        | 0.5                                                              | 80                                                  |
| [11] | AVC.3      |                           | 2.21                |              |             |                                                     | 59.7                                                       |                                                                  |                                                     |
| [12] | AVC.4      |                           |                     | 542          | 242.8       | 7.96                                                | 35                                                         |                                                                  |                                                     |
| [13] | VTC        |                           | 2.19                |              |             | 5.64                                                | 27.5                                                       | 0.35                                                             | 307                                                 |
| [14] | CGC        | 0.018 (110)               | 2.25                |              |             |                                                     |                                                            |                                                                  |                                                     |
| [15] | STCAD      | 0.0112 (110)              | 2.3                 |              | 411.47      |                                                     |                                                            |                                                                  | 426.43                                              |
| [16] | LCMC       | 0.0123 (200)              | 2.17                | 578          | 1126        | 2.1                                                 | 87.8                                                       | 0.48                                                             | 2975.7                                              |
| [17] | ITC.1      |                           | 2.18                | 574          | 300         | 30                                                  | 24                                                         |                                                                  |                                                     |
| [18] | ITC.2      |                           |                     | 550          | 981         | 60                                                  | 2.7                                                        |                                                                  |                                                     |
| [19] | ITC.3      |                           | 2.24                | 537          |             | 26                                                  | 4.36                                                       |                                                                  |                                                     |
| [20] | ITC.4      |                           |                     |              | 692         |                                                     | 201                                                        | 0.1                                                              | 21000                                               |
| [21] | PTG        | 0.00806 (100)             | 2.2                 | 562          | 1002        | 4.25                                                |                                                            | 0.67                                                             | 7275                                                |
|      | <b>VEC</b> | <b>0.00922 (001)</b>      | <b>2.20</b>         | <b>579</b>   | <b>1150</b> | <b>2.28</b>                                         | <b>130</b>                                                 | <b>0.054</b>                                                     | <b>24552</b>                                        |

**Table S5.** Dose rate calibration for 100 kVp X-ray illumination.

| Tube current<br>(mA) | Dose rate 1<br>( $\mu\text{Gy s}^{-1}$ ) | Dose rate 2<br>( $\mu\text{Gy s}^{-1}$ ) | Dose rate 3<br>( $\mu\text{Gy s}^{-1}$ ) | Average dose rate<br>( $\mu\text{Gy s}^{-1}$ ) |
|----------------------|------------------------------------------|------------------------------------------|------------------------------------------|------------------------------------------------|
| 10                   | 8.504                                    | 8.541                                    | 8.532                                    | 8.525666667                                    |
| 12.5                 | 10.5                                     | 10.67                                    | 10.58                                    | 10.583333333                                   |
| 16                   | 13.28                                    | 13.45                                    | 13.18                                    | 13.303333333                                   |
| 20                   | 16.79                                    | 17.1                                     | 16.8                                     | 16.896666667                                   |
| 25                   | 20.9                                     | 21.54                                    | 20.82                                    | 21.086666667                                   |

## References

- 1 F. Yao, J. Peng, R. Li, P. Li, B. Li, C. Liu, C. Tao, Q. Lin and G Fang, *Nat. Commun.*, 2020, **11**, 1194.
- 2 Z. Zhang, H. Li, H. Di, D. Liu, W. Jiang, J. Ren, Z. Fan, F. Liao, L. Lei, G. Li, Y. Xiong and Y. Zhao, *ACS Appl. Electron. Mater.*, 2023, **5**, 388-396.
- 3 Y. Liu, Y. Zhang, K. Zhao, Z. Yang, J. Feng, X. Zhang, K. Wang, L. Meng, H. Ye, M. Liu and S. F. Liu, *Adv. Mater.*, 2018, **30**, 1707314.
- 4 Y. Liu, Y. Zhang, Z. Yang, J. Feng, Z. Xu, Q. Li, M. Hu, H. Ye, X. Zhang, M. Liu, K. Zhao and S. F. Liu, *Mater. Today*, 2019, **22**, 67-75.
- 5 L. Chen, H. Wang, W. Zhang, F. Li, Z. Wang, X. Wang, Y. Shao and J. Shao, *ACS Appl. Mater. Interfaces*, 2022, **14**, 10917-10926.
- 6 L. Ma, Z. Yan, X. Zhou, Y. Pi, Y. Du, J. Huang, K. Wang, K. Wu, C. Zhuang and X. Han, *Nat. Commun.*, 2021, **12**, 2023.
- 7 A. Feng, S. Xie, X. Fu, Z. Chen and W. Zhu, *Front. Chem.* 2022, **9**, 823868.
- 8 Y. Cho, H. R. Jung, Y. S. Kim, Y. Kim, J. Park, S. Yoon, Y. Lee, M. Cheon, S.-Y. Jeong and W. Jo, *Nanoscale* 2021, **13**, 8275-8282.
- 9 D. Shi, V. Adinolfi, R. Comin, M. Yuan, E. Alarousu, A. Buin, Y. Chen, S. Hoogland, A. Rothenberger, K. Katsiev, Y. Losovyj, X. Zhang, P. A. Dowben, O. F. Mohammed, E. H. Sargent and O. M. Bakr, *Science*, 2015, **347**, 519-522.
- 10 H. Wei, Y. Fang, P. Mulligan, W. Chuirazzi, H.-H. Fang, C. Wang, B. R. Ecker, Y. Gao, M. A. Loi, L. Cao and J. Huang, *Nat. Photonics*, 2016, **10**, 333-339.
- 11 X. Liu, H. Zhang, B. Zhang, J. Dong, W. Jie and Y. Xu, *J. Phys. Chem. C* 2018, **122**, 14355-14361.
- 12 S. Rong, Y. Xiao, J. Jiang, Q. Zeng and Y. Li, *J. Phys. Chem. C* 2020, **124**, 8992-8998.
- 13 X. Wang, D. Zhao, Y. Qiu, Y. Huang, Y. Wu, G. Li, Q. Huang, Q. Khan, A. Nathan, W. Lei and J. Chen, *Phys. Status Solidi RRL* 2018, **12**, 1800380.
- 14 N. I. Selivanov, A. O. Murzin, V. I. Yudin, Y. V. Kapitonov and A. V. Emeline, *CryEngComm* 2022, **24**, 2976-2981.
- 15 L. Zhang, S. Cui, Q. Guo, C. Ge, Q. Han, Q. Lin, C. Li, X. Zheng, Z. Zhai, L. Wang, Q. Sun, Y. Xu, Y. Liu and X. Tao, *ACS Appl. Mater. Interfaces* 2020, **12**, 51616-51627.
- 16 Z. Zhu, W. Li, W. Deng, W. He, C. Yan, X. Peng, X. Zeng, Y. Gao, X. Fu, N. Lin, B. Gao and W. Yang,

*J. Mater. Chem. C* 2022, **10**, 6837-6845.

17 M. I. Saidaminov, A. L. Abdelhady, B. Murali, E. Alarousu, V. M. Burlakov, W. Peng, I. Dursun, L. Wang, Y. He, G. Maculan, A. Goriely, T. Wu, O. F. Mohammed and O. M. Bakr, *Nat. Commun.*, 2015, **6**, 7586.

18 X. Gong, Z. Huang, R. Sabatini, C.-S. Tan, G. Bappi, G. Walters, A. Proppe, M. I. Saidaminov, O. Voznyy, S. O. Kelley and E. H. Sargent, *Nat. Commun.* 2019, **10**, 1591.

19 Y. Liu, Z. Yang, D. Cui, X. Ren, J. Sun, X. Liu, J. Zhang, Q. Wei, H. Fan, F. Yu, X. Zhang, C. Zhao and S. F. Liu, *Adv. Mater.* 2015, **27**, 5176-5183.

20 W. Wei, Y. Zhang, Q. Xu, H. Wei, Y. Fang, Q. Wang, Y. Deng, T. Li, A. Gruverman, L. Cao and J. Huang, *Nat. Photonics*, 2017, **11**, 315-321.

21 D. Liu, L. Jiang, X. Jiang, X. Sun, G. Zhang, Y.-B. Lu, Y. Wang, Z. Wu and Z. Ling, *ACS Appl. Mater. Interfaces*, 2023, **15**, 57846-57855.
